# Supplementary material for: Evaluation of epidemiological lectures using peer instruction: focusing on the importance of ConcepTests
Source: PeerJ journal article supplement (doi:10.7717/peerj.9640), 2020-08-12
Supplement: Appendix_Table.xlsx [file Appendix_Table.xlsx]

## Sheet: Appendix Table
Appendix Table. List of ConcepTest
	Question text and topic	Answer Choice	Respondent
			before discussion	after discussion
ConcepTest #1	Research has shown that 60 out of 100 newly incident food poisoners ate bread for breakfast. Choose the most appropriate description. Topic: Epidemiological indicators (risk, morbidity, and prevalence)	1. The risk of food poisoning in people who ate bread is 0.6.	15 (12.50%)	2 (1.98%)
		2. The prevalence of food poisoning in people who ate bread is 0.6.	10 (08.33%)	3 (2.97%)
		3*. Knowing the number of people who have eaten bread allows us to calculate the risk of food poisoning for the people who ate bread.	55 (45.83%)	71 (70.30%)
		4. Knowing the number of people who have eaten bread allows us to calculate the prevalence of food poisoning for the people who ate bread.	40 (33.33%)	25 (24.75%)
ConcepTest #2	From the epidemic curve presented on screen, choose the least appropriate item. [Source of epidemic curve: Tauxe et al. 1987] Topic: Descriptive epidemiology (Spot map and epidemic curve)	1. Outbreak was with a single exposure.	20 (17.39%)	8 (7.48%)
		2*. Bacterial culture is needed to determine which of the two meals (supper or snack) is the cause.	25 (21.74%)	19 (17.76%)
		3. The incubation time is at most around 30 hours.	28 (24.35%)	13 (12.15%)
		4. The outbreak can be considered to have converged during the flight.	42 (36.52%)	67 (62.62%)
ConcepTest #3	The table on the slide summarizes the results of a case-control study on the association between the use of the thalidomide and neonatal malformations. Choose the most appropriate option. [Source of table: Tsuda. 2003.] Topic: Cohort study and case-control study (Study concept and interpretation of two by two table)	1. There are neonatal malformations in 22 pregnant women without taking the drug, which is unusually high proportion (0.11).	15 (12.93%)	4 (3.33%)
		2. Out of a total of 300, 92 pregnant women were taking the drug, which is unusually high proportion (0.31).	44 (37.93%)	2 (1.67%)
		3*. The exposure odds of cases (4.09) are unusually higher than those of controls (0.01).	37 (31.90%)	92 (76.67%)
		4.Because the prevalence of neonatal malformations (0.37) is abnormally high, odds ratios do not approximate risk ratios.	20 (17.24%)	22 (18.33%)
ConcepTest #4	Researchers report that underexercises have a 1.21 risk ratio (95% CI 0.72 to 2.05) compared to those who do exercise. Choose the most appropriate option. Topic: Random error (error evaluation and interpretation of confidence interval)	1. Underexercises does not increase cancer risk because it is not statistically significant.	31 (28.97%)	12 (11.88%)
		2. If the same study was performed 100 times and 95% confidence intervals were calculated 100 times, 95 intervals included the interval 0.72 to 2.05.	30 (28.04%)	14 (13.86%)
		3*.It is not known whether the true value of the “risk ratio of underexercises to cancer” falls in the interval 0.72 to 2.05.	38 (35.51%)	67 (66.34%)
		4. If a person becomes underexercise, the risk of getting cancer increases. The risk ratio is included in the interval of 0.72 to 2.05 with a probability of 95%.	8 (7.48%)	8 (7.92%)
ConcepTest #5	Suppose you are conducting a cohort study of the relationship between drug X and depressive symptoms in outpatients of a general hospital. Please choose the most appropriate option. Topic: Systematic error (selection bias, information bias, and confounding bias)	1. You will present a poster entitled “Recruiting Patients Taking Drug X for study” and recruit the study subjects.	20 (18.18%)	10 (9.43%)
		2. You will present a poster, "We are investigating the relationship between drug X and depression. Recruting Patients." and recruit the study subjects.	12 (10.91%)	8 (7.55%)
		3. You will ask for "Please carefully fill out the questionnaire of drug X" to obtain exposure information.	46 (41.82%)	15 (14.15%)
		4*. Those interviewing the subject and gathering outcome information should not know whether they are taking drug X.	32 (29.09%)	73 (68.87%)
* : correct answer
