# Supplementary material for: Evaluation of epidemiological lectures using peer instruction: focusing on the importance of ConcepTests
Source: PeerJ journal article supplement (doi:10.7717/peerj.9640), 2020-08-12
Supplement: rawData_response.xlsx [file rawData_response.xlsx]

## Sheet: rawData_response
Date	Session	Voter	Voter in session	Q1. Research has shown that 60 out of 100 newly incident food poisoners ate bread for breakfast. Choose the most appropriate description. (before discussion)	Q1. Research has shown that 60 out of 100 newly incident food poisoners ate bread for breakfast. Choose the most appropriate description. (after discussion)	Q2. From the epidemic curve presented on screen, choose the least appropriate item. (before discussion)	Q2. From the epidemic curve presented on screen, choose the least appropriate item. (after discussion)	Q3. The table on the slide summarizes the results of a case-control study on the association between the use of the thalidomide and neonatal malformations. Choose the most appropriate option. (before discussion)	Q3. The table on the slide summarizes the results of a case-control study on the association between the use of the thalidomide and neonatal malformations. Choose the most appropriate option. (after discussion)	Q4. Researchers report that underexercises have a 1.21 risk ratio (95% CI 0.72 to 2.05) compared to those who do exercise. Choose the most appropriate option. (before discussion)	Q4. Researchers report that underexercises have a 1.21 risk ratio (95% CI 0.72 to 2.05) compared to those who do exercise. Choose the most appropriate option. (after discussion)	Q5. Suppose you are conducting a cohort study of the relationship between drug X and depressive symptoms in outpatients of a general hospital. Please choose the most appropriate option. (before discussion)	Q5. Suppose you are conducting a cohort study of the relationship between drug X and depressive symptoms in outpatients of a general hospital. Please choose the most appropriate option. (after discussion)
2019-10-17	1	1	1	Knowing the number of people who have eaten bread allows us to calculate the risk of food poisoning for the people who ate bread.
2019-10-17	1	2	2	Knowing the number of people who have eaten bread allows us to calculate the risk of food poisoning for the people who ate bread.
2019-10-17	1	3	3	Knowing the number of people who have eaten bread allows us to calculate the prevalence of food poisoning for the people who ate bread.
2019-10-17	1	4	4	Knowing the number of people who have eaten bread allows us to calculate the prevalence of food poisoning for the people who ate bread.
2019-10-17	1	5	5	Knowing the number of people who have eaten bread allows us to calculate the prevalence of food poisoning for the people who ate bread.
2019-10-17	1	6	6	The risk of food poisoning in people who ate bread is 0.6.
2019-10-17	1	7	7	Knowing the number of people who have eaten bread allows us to calculate the risk of food poisoning for the people who ate bread.
2019-10-17	1	8	8	Knowing the number of people who have eaten bread allows us to calculate the risk of food poisoning for the people who ate bread.
2019-10-17	1	9	9	Knowing the number of people who have eaten bread allows us to calculate the prevalence of food poisoning for the people who ate bread.
2019-10-17	1	10	10	The risk of food poisoning in people who ate bread is 0.6.
2019-10-17	1	11	11	Knowing the number of people who have eaten bread allows us to calculate the prevalence of food poisoning for the people who ate bread.
2019-10-17	1	12	12	Knowing the number of people who have eaten bread allows us to calculate the prevalence of food poisoning for the people who ate bread.
2019-10-17	1	13	13	The prevalence of food poisoning in people who ate bread is 0.6.
2019-10-17	1	14	14	Knowing the number of people who have eaten bread allows us to calculate the risk of food poisoning for the people who ate bread.
2019-10-17	1	15	15	Knowing the number of people who have eaten bread allows us to calculate the risk of food poisoning for the people who ate bread.
2019-10-17	1	16	16	The prevalence of food poisoning in people who ate bread is 0.6.
2019-10-17	1	17	17	Knowing the number of people who have eaten bread allows us to calculate the prevalence of food poisoning for the people who ate bread.
2019-10-17	1	18	18	Knowing the number of people who have eaten bread allows us to calculate the risk of food poisoning for the people who ate bread.
2019-10-17	1	19	19	Knowing the number of people who have eaten bread allows us to calculate the risk of food poisoning for the people who ate bread.
2019-10-17	1	20	20	The risk of food poisoning in people who ate bread is 0.6.
2019-10-17	1	21	21	The risk of food poisoning in people who ate bread is 0.6.
2019-10-17	1	22	22	Knowing the number of people who have eaten bread allows us to calculate the prevalence of food poisoning for the people who ate bread.
2019-10-17	1	23	23	Knowing the number of people who have eaten bread allows us to calculate the risk of food poisoning for the people who ate bread.
2019-10-17	1	24	24	Knowing the number of people who have eaten bread allows us to calculate the prevalence of food poisoning for the people who ate bread.
2019-10-17	1	25	25	The risk of food poisoning in people who ate bread is 0.6.
2019-10-17	1	26	26	Knowing the number of people who have eaten bread allows us to calculate the risk of food poisoning for the people who ate bread.
2019-10-17	1	27	27	Knowing the number of people who have eaten bread allows us to calculate the prevalence of food poisoning for the people who ate bread.
2019-10-17	1	28	28	The risk of food poisoning in people who ate bread is 0.6.
2019-10-17	1	29	29	Knowing the number of people who have eaten bread allows us to calculate the risk of food poisoning for the people who ate bread.
2019-10-17	1	30	30	The risk of food poisoning in people who ate bread is 0.6.
2019-10-17	1	31	31	Knowing the number of people who have eaten bread allows us to calculate the prevalence of food poisoning for the people who ate bread.
2019-10-17	1	32	32	The risk of food poisoning in people who ate bread is 0.6.
2019-10-17	1	33	33	The prevalence of food poisoning in people who ate bread is 0.6.
2019-10-17	1	34	34	Knowing the number of people who have eaten bread allows us to calculate the prevalence of food poisoning for the people who ate bread.
2019-10-17	1	35	35	Knowing the number of people who have eaten bread allows us to calculate the prevalence of food poisoning for the people who ate bread.
2019-10-17	1	36	36	The prevalence of food poisoning in people who ate bread is 0.6.
2019-10-17	1	37	37	Knowing the number of people who have eaten bread allows us to calculate the prevalence of food poisoning for the people who ate bread.
2019-10-17	1	38	38	Knowing the number of people who have eaten bread allows us to calculate the risk of food poisoning for the people who ate bread.
2019-10-17	1	39	39	Knowing the number of people who have eaten bread allows us to calculate the risk of food poisoning for the people who ate bread.
2019-10-17	1	40	40	Knowing the number of people who have eaten bread allows us to calculate the risk of food poisoning for the people who ate bread.
2019-10-17	1	41	41	The prevalence of food poisoning in people who ate bread is 0.6.
2019-10-17	1	42	42	Knowing the number of people who have eaten bread allows us to calculate the risk of food poisoning for the people who ate bread.
2019-10-17	1	43	43	Knowing the number of people who have eaten bread allows us to calculate the risk of food poisoning for the people who ate bread.
2019-10-17	1	44	44	Knowing the number of people who have eaten bread allows us to calculate the risk of food poisoning for the people who ate bread.
2019-10-17	1	45	45	Knowing the number of people who have eaten bread allows us to calculate the risk of food poisoning for the people who ate bread.
2019-10-17	1	46	46	Knowing the number of people who have eaten bread allows us to calculate the risk of food poisoning for the people who ate bread.
2019-10-17	1	47	47	Knowing the number of people who have eaten bread allows us to calculate the risk of food poisoning for the people who ate bread.
2019-10-17	1	48	48	Knowing the number of people who have eaten bread allows us to calculate the prevalence of food poisoning for the people who ate bread.
2019-10-17	1	49	49	Knowing the number of people who have eaten bread allows us to calculate the risk of food poisoning for the people who ate bread.
2019-10-17	1	50	50	Knowing the number of people who have eaten bread allows us to calculate the risk of food poisoning for the people who ate bread.
2019-10-17	1	51	51	Knowing the number of people who have eaten bread allows us to calculate the risk of food poisoning for the people who ate bread.
2019-10-17	1	52	52	Knowing the number of people who have eaten bread allows us to calculate the prevalence of food poisoning for the people who ate bread.
2019-10-17	1	53	53	Knowing the number of people who have eaten bread allows us to calculate the risk of food poisoning for the people who ate bread.
2019-10-17	1	54	54	Knowing the number of people who have eaten bread allows us to calculate the risk of food poisoning for the people who ate bread.
2019-10-17	1	55	55	The risk of food poisoning in people who ate bread is 0.6.
2019-10-17	1	56	56	Knowing the number of people who have eaten bread allows us to calculate the prevalence of food poisoning for the people who ate bread.
2019-10-17	1	57	57	The prevalence of food poisoning in people who ate bread is 0.6.
2019-10-17	1	58	58	Knowing the number of people who have eaten bread allows us to calculate the risk of food poisoning for the people who ate bread.
2019-10-17	1	59	59	Knowing the number of people who have eaten bread allows us to calculate the risk of food poisoning for the people who ate bread.
2019-10-17	1	60	60	Knowing the number of people who have eaten bread allows us to calculate the prevalence of food poisoning for the people who ate bread.
2019-10-17	1	61	61	Knowing the number of people who have eaten bread allows us to calculate the prevalence of food poisoning for the people who ate bread.
2019-10-17	1	62	62	The prevalence of food poisoning in people who ate bread is 0.6.
2019-10-17	1	63	63	The risk of food poisoning in people who ate bread is 0.6.
2019-10-17	1	64	64	The risk of food poisoning in people who ate bread is 0.6.
2019-10-17	1	65	65	Knowing the number of people who have eaten bread allows us to calculate the prevalence of food poisoning for the people who ate bread.
2019-10-17	1	66	66	Knowing the number of people who have eaten bread allows us to calculate the prevalence of food poisoning for the people who ate bread.
2019-10-17	1	67	67	Knowing the number of people who have eaten bread allows us to calculate the risk of food poisoning for the people who ate bread.
2019-10-17	1	68	68	Knowing the number of people who have eaten bread allows us to calculate the prevalence of food poisoning for the people who ate bread.
2019-10-17	1	69	69	The prevalence of food poisoning in people who ate bread is 0.6.
2019-10-17	1	70	70	Knowing the number of people who have eaten bread allows us to calculate the risk of food poisoning for the people who ate bread.
2019-10-17	1	71	71	Knowing the number of people who have eaten bread allows us to calculate the prevalence of food poisoning for the people who ate bread.
2019-10-17	1	72	72	Knowing the number of people who have eaten bread allows us to calculate the prevalence of food poisoning for the people who ate bread.
2019-10-17	1	73	73	The risk of food poisoning in people who ate bread is 0.6.
2019-10-17	1	74	74	The risk of food poisoning in people who ate bread is 0.6.
2019-10-17	1	75	75	Knowing the number of people who have eaten bread allows us to calculate the risk of food poisoning for the people who ate bread.
2019-10-17	1	76	76	Knowing the number of people who have eaten bread allows us to calculate the risk of food poisoning for the people who ate bread.
2019-10-17	1	77	77	Knowing the number of people who have eaten bread allows us to calculate the risk of food poisoning for the people who ate bread.
2019-10-17	1	78	78	Knowing the number of people who have eaten bread allows us to calculate the risk of food poisoning for the people who ate bread.
2019-10-17	1	79	79	Knowing the number of people who have eaten bread allows us to calculate the risk of food poisoning for the people who ate bread.
2019-10-17	1	80	80	Knowing the number of people who have eaten bread allows us to calculate the prevalence of food poisoning for the people who ate bread.
2019-10-17	1	81	81	Knowing the number of people who have eaten bread allows us to calculate the prevalence of food poisoning for the people who ate bread.
2019-10-17	1	82	82	Knowing the number of people who have eaten bread allows us to calculate the risk of food poisoning for the people who ate bread.
2019-10-17	1	83	83	Knowing the number of people who have eaten bread allows us to calculate the risk of food poisoning for the people who ate bread.
2019-10-17	1	84	84	Knowing the number of people who have eaten bread allows us to calculate the prevalence of food poisoning for the people who ate bread.
2019-10-17	1	85	85	Knowing the number of people who have eaten bread allows us to calculate the prevalence of food poisoning for the people who ate bread.
2019-10-17	1	86	86	Knowing the number of people who have eaten bread allows us to calculate the risk of food poisoning for the people who ate bread.
2019-10-17	1	87	87	Knowing the number of people who have eaten bread allows us to calculate the risk of food poisoning for the people who ate bread.
2019-10-17	1	88	88	Knowing the number of people who have eaten bread allows us to calculate the risk of food poisoning for the people who ate bread.
2019-10-17	1	89	89	The risk of food poisoning in people who ate bread is 0.6.
2019-10-17	1	90	90	Knowing the number of people who have eaten bread allows us to calculate the risk of food poisoning for the people who ate bread.
2019-10-17	1	91	91	Knowing the number of people who have eaten bread allows us to calculate the prevalence of food poisoning for the people who ate bread.
2019-10-17	1	92	92	Knowing the number of people who have eaten bread allows us to calculate the risk of food poisoning for the people who ate bread.
2019-10-17	1	93	93	Knowing the number of people who have eaten bread allows us to calculate the risk of food poisoning for the people who ate bread.
2019-10-17	1	94	94	Knowing the number of people who have eaten bread allows us to calculate the risk of food poisoning for the people who ate bread.
2019-10-17	1	95	95	Knowing the number of people who have eaten bread allows us to calculate the risk of food poisoning for the people who ate bread.
2019-10-17	1	96	96	Knowing the number of people who have eaten bread allows us to calculate the prevalence of food poisoning for the people who ate bread.
2019-10-17	1	97	97	Knowing the number of people who have eaten bread allows us to calculate the prevalence of food poisoning for the people who ate bread.
2019-10-17	1	98	98	Knowing the number of people who have eaten bread allows us to calculate the prevalence of food poisoning for the people who ate bread.
2019-10-17	1	99	99	Knowing the number of people who have eaten bread allows us to calculate the risk of food poisoning for the people who ate bread.
2019-10-17	1	100	100	Knowing the number of people who have eaten bread allows us to calculate the risk of food poisoning for the people who ate bread.
2019-10-17	1	101	101	Knowing the number of people who have eaten bread allows us to calculate the risk of food poisoning for the people who ate bread.
2019-10-17	1	102	102	Knowing the number of people who have eaten bread allows us to calculate the risk of food poisoning for the people who ate bread.
2019-10-17	1	103	103	Knowing the number of people who have eaten bread allows us to calculate the risk of food poisoning for the people who ate bread.
2019-10-17	1	104	104	Knowing the number of people who have eaten bread allows us to calculate the prevalence of food poisoning for the people who ate bread.
2019-10-17	1	105	105	Knowing the number of people who have eaten bread allows us to calculate the risk of food poisoning for the people who ate bread.
2019-10-17	1	106	106	Knowing the number of people who have eaten bread allows us to calculate the prevalence of food poisoning for the people who ate bread.
2019-10-17	1	107	107	Knowing the number of people who have eaten bread allows us to calculate the risk of food poisoning for the people who ate bread.
2019-10-17	1	108	108	The prevalence of food poisoning in people who ate bread is 0.6.
2019-10-17	1	109	109	Knowing the number of people who have eaten bread allows us to calculate the prevalence of food poisoning for the people who ate bread.
2019-10-17	1	110	110	Knowing the number of people who have eaten bread allows us to calculate the risk of food poisoning for the people who ate bread.
2019-10-17	1	111	111	Knowing the number of people who have eaten bread allows us to calculate the risk of food poisoning for the people who ate bread.
2019-10-17	1	112	112	Knowing the number of people who have eaten bread allows us to calculate the prevalence of food poisoning for the people who ate bread.
2019-10-17	1	113	113	The prevalence of food poisoning in people who ate bread is 0.6.
2019-10-17	1	114	114	Knowing the number of people who have eaten bread allows us to calculate the prevalence of food poisoning for the people who ate bread.
2019-10-17	1	115	115	Knowing the number of people who have eaten bread allows us to calculate the prevalence of food poisoning for the people who ate bread.
2019-10-17	1	116	116	Knowing the number of people who have eaten bread allows us to calculate the prevalence of food poisoning for the people who ate bread.
2019-10-17	1	117	117	Knowing the number of people who have eaten bread allows us to calculate the risk of food poisoning for the people who ate bread.
2019-10-17	1	118	118	Knowing the number of people who have eaten bread allows us to calculate the risk of food poisoning for the people who ate bread.
2019-10-17	1	119	119	The risk of food poisoning in people who ate bread is 0.6.
2019-10-17	1	120	120	Knowing the number of people who have eaten bread allows us to calculate the prevalence of food poisoning for the people who ate bread.
2019-10-17	2	121	1		Knowing the number of people who have eaten bread allows us to calculate the risk of food poisoning for the people who ate bread.
2019-10-17	2	122	2		Knowing the number of people who have eaten bread allows us to calculate the risk of food poisoning for the people who ate bread.
2019-10-17	2	123	3		Knowing the number of people who have eaten bread allows us to calculate the prevalence of food poisoning for the people who ate bread.
2019-10-17	2	124	4		Knowing the number of people who have eaten bread allows us to calculate the prevalence of food poisoning for the people who ate bread.
2019-10-17	2	125	5		Knowing the number of people who have eaten bread allows us to calculate the prevalence of food poisoning for the people who ate bread.
2019-10-17	2	126	6		Knowing the number of people who have eaten bread allows us to calculate the risk of food poisoning for the people who ate bread.
2019-10-17	2	127	7		Knowing the number of people who have eaten bread allows us to calculate the prevalence of food poisoning for the people who ate bread.
2019-10-17	2	128	8		Knowing the number of people who have eaten bread allows us to calculate the risk of food poisoning for the people who ate bread.
2019-10-17	2	129	9		Knowing the number of people who have eaten bread allows us to calculate the risk of food poisoning for the people who ate bread.
2019-10-17	2	130	10		Knowing the number of people who have eaten bread allows us to calculate the prevalence of food poisoning for the people who ate bread.
2019-10-17	2	131	11		Knowing the number of people who have eaten bread allows us to calculate the prevalence of food poisoning for the people who ate bread.
2019-10-17	2	132	12		Knowing the number of people who have eaten bread allows us to calculate the prevalence of food poisoning for the people who ate bread.
2019-10-17	2	133	13		Knowing the number of people who have eaten bread allows us to calculate the risk of food poisoning for the people who ate bread.
2019-10-17	2	134	14		Knowing the number of people who have eaten bread allows us to calculate the risk of food poisoning for the people who ate bread.
2019-10-17	2	135	15		The prevalence of food poisoning in people who ate bread is 0.6.
2019-10-17	2	136	16		Knowing the number of people who have eaten bread allows us to calculate the risk of food poisoning for the people who ate bread.
2019-10-17	2	137	17		Knowing the number of people who have eaten bread allows us to calculate the risk of food poisoning for the people who ate bread.
2019-10-17	2	138	18		Knowing the number of people who have eaten bread allows us to calculate the risk of food poisoning for the people who ate bread.
2019-10-17	2	139	19		The risk of food poisoning in people who ate bread is 0.6.
2019-10-17	2	140	20		Knowing the number of people who have eaten bread allows us to calculate the risk of food poisoning for the people who ate bread.
2019-10-17	2	141	21		Knowing the number of people who have eaten bread allows us to calculate the prevalence of food poisoning for the people who ate bread.
2019-10-17	2	142	22		Knowing the number of people who have eaten bread allows us to calculate the risk of food poisoning for the people who ate bread.
2019-10-17	2	143	23		Knowing the number of people who have eaten bread allows us to calculate the prevalence of food poisoning for the people who ate bread.
2019-10-17	2	144	24		Knowing the number of people who have eaten bread allows us to calculate the risk of food poisoning for the people who ate bread.
2019-10-17	2	145	25		Knowing the number of people who have eaten bread allows us to calculate the risk of food poisoning for the people who ate bread.
2019-10-17	2	146	26		Knowing the number of people who have eaten bread allows us to calculate the prevalence of food poisoning for the people who ate bread.
2019-10-17	2	147	27		The risk of food poisoning in people who ate bread is 0.6.
2019-10-17	2	148	28		Knowing the number of people who have eaten bread allows us to calculate the risk of food poisoning for the people who ate bread.
2019-10-17	2	149	29		Knowing the number of people who have eaten bread allows us to calculate the risk of food poisoning for the people who ate bread.
2019-10-17	2	150	30		Knowing the number of people who have eaten bread allows us to calculate the risk of food poisoning for the people who ate bread.
2019-10-17	2	151	31		Knowing the number of people who have eaten bread allows us to calculate the prevalence of food poisoning for the people who ate bread.
2019-10-17	2	152	32		Knowing the number of people who have eaten bread allows us to calculate the prevalence of food poisoning for the people who ate bread.
2019-10-17	2	153	33		Knowing the number of people who have eaten bread allows us to calculate the prevalence of food poisoning for the people who ate bread.
2019-10-17	2	154	34		Knowing the number of people who have eaten bread allows us to calculate the prevalence of food poisoning for the people who ate bread.
2019-10-17	2	155	35		Knowing the number of people who have eaten bread allows us to calculate the risk of food poisoning for the people who ate bread.
2019-10-17	2	156	36		Knowing the number of people who have eaten bread allows us to calculate the risk of food poisoning for the people who ate bread.
2019-10-17	2	157	37		Knowing the number of people who have eaten bread allows us to calculate the risk of food poisoning for the people who ate bread.
2019-10-17	2	158	38		Knowing the number of people who have eaten bread allows us to calculate the risk of food poisoning for the people who ate bread.
2019-10-17	2	159	39		Knowing the number of people who have eaten bread allows us to calculate the risk of food poisoning for the people who ate bread.
2019-10-17	2	160	40		Knowing the number of people who have eaten bread allows us to calculate the risk of food poisoning for the people who ate bread.
2019-10-17	2	161	41		Knowing the number of people who have eaten bread allows us to calculate the risk of food poisoning for the people who ate bread.
2019-10-17	2	162	42		Knowing the number of people who have eaten bread allows us to calculate the risk of food poisoning for the people who ate bread.
2019-10-17	2	163	43		Knowing the number of people who have eaten bread allows us to calculate the prevalence of food poisoning for the people who ate bread.
2019-10-17	2	164	44		Knowing the number of people who have eaten bread allows us to calculate the risk of food poisoning for the people who ate bread.
2019-10-17	2	165	45		Knowing the number of people who have eaten bread allows us to calculate the risk of food poisoning for the people who ate bread.
2019-10-17	2	166	46		Knowing the number of people who have eaten bread allows us to calculate the risk of food poisoning for the people who ate bread.
2019-10-17	2	167	47		Knowing the number of people who have eaten bread allows us to calculate the risk of food poisoning for the people who ate bread.
2019-10-17	2	168	48		Knowing the number of people who have eaten bread allows us to calculate the prevalence of food poisoning for the people who ate bread.
2019-10-17	2	169	49		Knowing the number of people who have eaten bread allows us to calculate the risk of food poisoning for the people who ate bread.
2019-10-17	2	170	50		Knowing the number of people who have eaten bread allows us to calculate the risk of food poisoning for the people who ate bread.
2019-10-17	2	171	51		Knowing the number of people who have eaten bread allows us to calculate the risk of food poisoning for the people who ate bread.
2019-10-17	2	172	52		Knowing the number of people who have eaten bread allows us to calculate the risk of food poisoning for the people who ate bread.
2019-10-17	2	173	53		Knowing the number of people who have eaten bread allows us to calculate the risk of food poisoning for the people who ate bread.
2019-10-17	2	174	54		Knowing the number of people who have eaten bread allows us to calculate the prevalence of food poisoning for the people who ate bread.
2019-10-17	2	175	55		Knowing the number of people who have eaten bread allows us to calculate the risk of food poisoning for the people who ate bread.
2019-10-17	2	176	56		Knowing the number of people who have eaten bread allows us to calculate the risk of food poisoning for the people who ate bread.
2019-10-17	2	177	57		Knowing the number of people who have eaten bread allows us to calculate the risk of food poisoning for the people who ate bread.
2019-10-17	2	178	58		Knowing the number of people who have eaten bread allows us to calculate the risk of food poisoning for the people who ate bread.
2019-10-17	2	179	59		Knowing the number of people who have eaten bread allows us to calculate the risk of food poisoning for the people who ate bread.
2019-10-17	2	180	60		Knowing the number of people who have eaten bread allows us to calculate the risk of food poisoning for the people who ate bread.
2019-10-17	2	181	61		Knowing the number of people who have eaten bread allows us to calculate the prevalence of food poisoning for the people who ate bread.
2019-10-17	2	182	62		Knowing the number of people who have eaten bread allows us to calculate the prevalence of food poisoning for the people who ate bread.
2019-10-17	2	183	63		Knowing the number of people who have eaten bread allows us to calculate the risk of food poisoning for the people who ate bread.
2019-10-17	2	184	64		Knowing the number of people who have eaten bread allows us to calculate the risk of food poisoning for the people who ate bread.
2019-10-17	2	185	65		Knowing the number of people who have eaten bread allows us to calculate the prevalence of food poisoning for the people who ate bread.
2019-10-17	2	186	66		Knowing the number of people who have eaten bread allows us to calculate the risk of food poisoning for the people who ate bread.
2019-10-17	2	187	67		Knowing the number of people who have eaten bread allows us to calculate the risk of food poisoning for the people who ate bread.
2019-10-17	2	188	68		Knowing the number of people who have eaten bread allows us to calculate the risk of food poisoning for the people who ate bread.
2019-10-17	2	189	69		Knowing the number of people who have eaten bread allows us to calculate the risk of food poisoning for the people who ate bread.
2019-10-17	2	190	70		Knowing the number of people who have eaten bread allows us to calculate the risk of food poisoning for the people who ate bread.
2019-10-17	2	191	71		Knowing the number of people who have eaten bread allows us to calculate the risk of food poisoning for the people who ate bread.
2019-10-17	2	192	72		Knowing the number of people who have eaten bread allows us to calculate the risk of food poisoning for the people who ate bread.
2019-10-17	2	193	73		Knowing the number of people who have eaten bread allows us to calculate the risk of food poisoning for the people who ate bread.
2019-10-17	2	194	74		Knowing the number of people who have eaten bread allows us to calculate the prevalence of food poisoning for the people who ate bread.
2019-10-17	2	195	75		Knowing the number of people who have eaten bread allows us to calculate the risk of food poisoning for the people who ate bread.
2019-10-17	2	196	76		Knowing the number of people who have eaten bread allows us to calculate the prevalence of food poisoning for the people who ate bread.
2019-10-17	2	197	77		Knowing the number of people who have eaten bread allows us to calculate the risk of food poisoning for the people who ate bread.
2019-10-17	2	198	78		Knowing the number of people who have eaten bread allows us to calculate the risk of food poisoning for the people who ate bread.
2019-10-17	2	199	79		Knowing the number of people who have eaten bread allows us to calculate the risk of food poisoning for the people who ate bread.
2019-10-17	2	200	80		Knowing the number of people who have eaten bread allows us to calculate the risk of food poisoning for the people who ate bread.
2019-10-17	2	201	81		Knowing the number of people who have eaten bread allows us to calculate the risk of food poisoning for the people who ate bread.
2019-10-17	2	202	82		Knowing the number of people who have eaten bread allows us to calculate the risk of food poisoning for the people who ate bread.
2019-10-17	2	203	83		Knowing the number of people who have eaten bread allows us to calculate the risk of food poisoning for the people who ate bread.
2019-10-17	2	204	84		Knowing the number of people who have eaten bread allows us to calculate the risk of food poisoning for the people who ate bread.
2019-10-17	2	205	85		Knowing the number of people who have eaten bread allows us to calculate the risk of food poisoning for the people who ate bread.
2019-10-17	2	206	86		Knowing the number of people who have eaten bread allows us to calculate the risk of food poisoning for the people who ate bread.
2019-10-17	2	207	87		Knowing the number of people who have eaten bread allows us to calculate the risk of food poisoning for the people who ate bread.
2019-10-17	2	208	88		Knowing the number of people who have eaten bread allows us to calculate the risk of food poisoning for the people who ate bread.
2019-10-17	2	209	89		Knowing the number of people who have eaten bread allows us to calculate the risk of food poisoning for the people who ate bread.
2019-10-17	2	210	90		Knowing the number of people who have eaten bread allows us to calculate the risk of food poisoning for the people who ate bread.
2019-10-17	2	211	91		Knowing the number of people who have eaten bread allows us to calculate the risk of food poisoning for the people who ate bread.
2019-10-17	2	212	92		The prevalence of food poisoning in people who ate bread is 0.6.
2019-10-17	2	213	93		The prevalence of food poisoning in people who ate bread is 0.6.
2019-10-17	2	214	94		Knowing the number of people who have eaten bread allows us to calculate the risk of food poisoning for the people who ate bread.
2019-10-17	2	215	95		Knowing the number of people who have eaten bread allows us to calculate the risk of food poisoning for the people who ate bread.
2019-10-17	2	216	96		Knowing the number of people who have eaten bread allows us to calculate the prevalence of food poisoning for the people who ate bread.
2019-10-17	2	217	97		Knowing the number of people who have eaten bread allows us to calculate the prevalence of food poisoning for the people who ate bread.
2019-10-17	2	218	98		Knowing the number of people who have eaten bread allows us to calculate the prevalence of food poisoning for the people who ate bread.
2019-10-17	2	219	99		Knowing the number of people who have eaten bread allows us to calculate the risk of food poisoning for the people who ate bread.
2019-10-17	2	220	100		Knowing the number of people who have eaten bread allows us to calculate the risk of food poisoning for the people who ate bread.
2019-10-17	2	221	101		Knowing the number of people who have eaten bread allows us to calculate the risk of food poisoning for the people who ate bread.
2019-10-17	3	222	1			The incubation time is at most around 30 hours.
2019-10-17	3	223	2			The outbreak can be considered to have converged during the flight.
2019-10-17	3	224	3			Outbreak was with a single exposure.
2019-10-17	3	225	4			The incubation time is at most around 30 hours.
2019-10-17	3	226	5			The incubation time is at most around 30 hours.
2019-10-17	3	227	6			Bacterial culture is needed to determine which of the two meals (supper or snack) is the cause.
2019-10-17	3	228	7			Outbreak was with a single exposure.
2019-10-17	3	229	8			The incubation time is at most around 30 hours.
2019-10-17	3	230	9			The outbreak can be considered to have converged during the flight.
2019-10-17	3	231	10			The outbreak can be considered to have converged during the flight.
2019-10-17	3	232	11			The incubation time is at most around 30 hours.
2019-10-17	3	233	12			Outbreak was with a single exposure.
2019-10-17	3	234	13			Bacterial culture is needed to determine which of the two meals (supper or snack) is the cause.
2019-10-17	3	235	14			The outbreak can be considered to have converged during the flight.
2019-10-17	3	236	15			Outbreak was with a single exposure.
2019-10-17	3	237	16			The outbreak can be considered to have converged during the flight.
2019-10-17	3	238	17			The outbreak can be considered to have converged during the flight.
2019-10-17	3	239	18			The incubation time is at most around 30 hours.
2019-10-17	3	240	19			Outbreak was with a single exposure.
2019-10-17	3	241	20			The incubation time is at most around 30 hours.
2019-10-17	3	242	21			Bacterial culture is needed to determine which of the two meals (supper or snack) is the cause.
2019-10-17	3	243	22			Outbreak was with a single exposure.
2019-10-17	3	244	23			The outbreak can be considered to have converged during the flight.
2019-10-17	3	245	24			The outbreak can be considered to have converged during the flight.
2019-10-17	3	246	25			The incubation time is at most around 30 hours.
2019-10-17	3	247	26			Outbreak was with a single exposure.
2019-10-17	3	248	27			The incubation time is at most around 30 hours.
2019-10-17	3	249	28			Outbreak was with a single exposure.
2019-10-17	3	250	29			Outbreak was with a single exposure.
2019-10-17	3	251	30			Bacterial culture is needed to determine which of the two meals (supper or snack) is the cause.
2019-10-17	3	252	31			Bacterial culture is needed to determine which of the two meals (supper or snack) is the cause.
2019-10-17	3	253	32			Bacterial culture is needed to determine which of the two meals (supper or snack) is the cause.
2019-10-17	3	254	33			Bacterial culture is needed to determine which of the two meals (supper or snack) is the cause.
2019-10-17	3	255	34			The incubation time is at most around 30 hours.
2019-10-17	3	256	35			Bacterial culture is needed to determine which of the two meals (supper or snack) is the cause.
2019-10-17	3	257	36			The outbreak can be considered to have converged during the flight.
2019-10-17	3	258	37			The outbreak can be considered to have converged during the flight.
2019-10-17	3	259	38			The outbreak can be considered to have converged during the flight.
2019-10-17	3	260	39			The outbreak can be considered to have converged during the flight.
2019-10-17	3	261	40			Outbreak was with a single exposure.
2019-10-17	3	262	41			The incubation time is at most around 30 hours.
2019-10-17	3	263	42			Outbreak was with a single exposure.
2019-10-17	3	264	43			Bacterial culture is needed to determine which of the two meals (supper or snack) is the cause.
2019-10-17	3	265	44			The outbreak can be considered to have converged during the flight.
2019-10-17	3	266	45			Bacterial culture is needed to determine which of the two meals (supper or snack) is the cause.
2019-10-17	3	267	46			The outbreak can be considered to have converged during the flight.
2019-10-17	3	268	47			The incubation time is at most around 30 hours.
2019-10-17	3	269	48			Bacterial culture is needed to determine which of the two meals (supper or snack) is the cause.
2019-10-17	3	270	49			Outbreak was with a single exposure.
2019-10-17	3	271	50			Outbreak was with a single exposure.
2019-10-17	3	272	51			Bacterial culture is needed to determine which of the two meals (supper or snack) is the cause.
2019-10-17	3	273	52			The incubation time is at most around 30 hours.
2019-10-17	3	274	53			The outbreak can be considered to have converged during the flight.
2019-10-17	3	275	54			The outbreak can be considered to have converged during the flight.
2019-10-17	3	276	55			Bacterial culture is needed to determine which of the two meals (supper or snack) is the cause.
2019-10-17	3	277	56			The outbreak can be considered to have converged during the flight.
2019-10-17	3	278	57			The incubation time is at most around 30 hours.
2019-10-17	3	279	58			Bacterial culture is needed to determine which of the two meals (supper or snack) is the cause.
2019-10-17	3	280	59			The incubation time is at most around 30 hours.
2019-10-17	3	281	60			The incubation time is at most around 30 hours.
2019-10-17	3	282	61			The outbreak can be considered to have converged during the flight.
2019-10-17	3	283	62			Bacterial culture is needed to determine which of the two meals (supper or snack) is the cause.
2019-10-17	3	284	63			Outbreak was with a single exposure.
2019-10-17	3	285	64			The outbreak can be considered to have converged during the flight.
2019-10-17	3	286	65			Bacterial culture is needed to determine which of the two meals (supper or snack) is the cause.
2019-10-17	3	287	66			The outbreak can be considered to have converged during the flight.
2019-10-17	3	288	67			The outbreak can be considered to have converged during the flight.
2019-10-17	3	289	68			The incubation time is at most around 30 hours.
2019-10-17	3	290	69			The outbreak can be considered to have converged during the flight.
2019-10-17	3	291	70			The outbreak can be considered to have converged during the flight.
2019-10-17	3	292	71			The incubation time is at most around 30 hours.
2019-10-17	3	293	72			The incubation time is at most around 30 hours.
2019-10-17	3	294	73			Bacterial culture is needed to determine which of the two meals (supper or snack) is the cause.
2019-10-17	3	295	74			Bacterial culture is needed to determine which of the two meals (supper or snack) is the cause.
2019-10-17	3	296	75			Outbreak was with a single exposure.
2019-10-17	3	297	76			The outbreak can be considered to have converged during the flight.
2019-10-17	3	298	77			The outbreak can be considered to have converged during the flight.
2019-10-17	3	299	78			Outbreak was with a single exposure.
2019-10-17	3	300	79			The outbreak can be considered to have converged during the flight.
2019-10-17	3	301	80			The outbreak can be considered to have converged during the flight.
2019-10-17	3	302	81			The incubation time is at most around 30 hours.
2019-10-17	3	303	82			The outbreak can be considered to have converged during the flight.
2019-10-17	3	304	83			Outbreak was with a single exposure.
2019-10-17	3	305	84			The outbreak can be considered to have converged during the flight.
2019-10-17	3	306	85			Bacterial culture is needed to determine which of the two meals (supper or snack) is the cause.
2019-10-17	3	307	86			The incubation time is at most around 30 hours.
2019-10-17	3	308	87			The outbreak can be considered to have converged during the flight.
2019-10-17	3	309	88			The outbreak can be considered to have converged during the flight.
2019-10-17	3	310	89			The incubation time is at most around 30 hours.
2019-10-17	3	311	90			Bacterial culture is needed to determine which of the two meals (supper or snack) is the cause.
2019-10-17	3	312	91			Bacterial culture is needed to determine which of the two meals (supper or snack) is the cause.
2019-10-17	3	313	92			The incubation time is at most around 30 hours.
2019-10-17	3	314	93			The outbreak can be considered to have converged during the flight.
2019-10-17	3	315	94			The outbreak can be considered to have converged during the flight.
2019-10-17	3	316	95			The outbreak can be considered to have converged during the flight.
2019-10-17	3	317	96			The outbreak can be considered to have converged during the flight.
2019-10-17	3	318	97			The incubation time is at most around 30 hours.
2019-10-17	3	319	98			The outbreak can be considered to have converged during the flight.
2019-10-17	3	320	99			Bacterial culture is needed to determine which of the two meals (supper or snack) is the cause.
2019-10-17	3	321	100			Outbreak was with a single exposure.
2019-10-17	3	322	101			The incubation time is at most around 30 hours.
2019-10-17	3	323	102			The incubation time is at most around 30 hours.
2019-10-17	3	324	103			The outbreak can be considered to have converged during the flight.
2019-10-17	3	325	104			Outbreak was with a single exposure.
2019-10-17	3	326	105			Bacterial culture is needed to determine which of the two meals (supper or snack) is the cause.
2019-10-17	3	327	106			The outbreak can be considered to have converged during the flight.
2019-10-17	3	328	107			The outbreak can be considered to have converged during the flight.
2019-10-17	3	329	108			The outbreak can be considered to have converged during the flight.
2019-10-17	3	330	109			The incubation time is at most around 30 hours.
2019-10-17	3	331	110			The outbreak can be considered to have converged during the flight.
2019-10-17	3	332	111			Bacterial culture is needed to determine which of the two meals (supper or snack) is the cause.
2019-10-17	3	333	112			The outbreak can be considered to have converged during the flight.
2019-10-17	3	334	113			The incubation time is at most around 30 hours.
2019-10-17	3	335	114			Outbreak was with a single exposure.
2019-10-17	3	336	115			Bacterial culture is needed to determine which of the two meals (supper or snack) is the cause.
2019-10-17	4	337	1				The outbreak can be considered to have converged during the flight.
2019-10-17	4	338	2				The outbreak can be considered to have converged during the flight.
2019-10-17	4	339	3				Outbreak was with a single exposure.
2019-10-17	4	340	4				The outbreak can be considered to have converged during the flight.
2019-10-17	4	341	5				The outbreak can be considered to have converged during the flight.
2019-10-17	4	342	6				The outbreak can be considered to have converged during the flight.
2019-10-17	4	343	7				The outbreak can be considered to have converged during the flight.
2019-10-17	4	344	8				The outbreak can be considered to have converged during the flight.
2019-10-17	4	345	9				The outbreak can be considered to have converged during the flight.
2019-10-17	4	346	10				The incubation time is at most around 30 hours.
2019-10-17	4	347	11				The outbreak can be considered to have converged during the flight.
2019-10-17	4	348	12				Bacterial culture is needed to determine which of the two meals (supper or snack) is the cause.
2019-10-17	4	349	13				Bacterial culture is needed to determine which of the two meals (supper or snack) is the cause.
2019-10-17	4	350	14				The outbreak can be considered to have converged during the flight.
2019-10-17	4	351	15				The incubation time is at most around 30 hours.
2019-10-17	4	352	16				Bacterial culture is needed to determine which of the two meals (supper or snack) is the cause.
2019-10-17	4	353	17				Bacterial culture is needed to determine which of the two meals (supper or snack) is the cause.
2019-10-17	4	354	18				The outbreak can be considered to have converged during the flight.
2019-10-17	4	355	19				Outbreak was with a single exposure.
2019-10-17	4	356	20				The outbreak can be considered to have converged during the flight.
2019-10-17	4	357	21				Bacterial culture is needed to determine which of the two meals (supper or snack) is the cause.
2019-10-17	4	358	22				The outbreak can be considered to have converged during the flight.
2019-10-17	4	359	23				The incubation time is at most around 30 hours.
2019-10-17	4	360	24				The outbreak can be considered to have converged during the flight.
2019-10-17	4	361	25				Outbreak was with a single exposure.
2019-10-17	4	362	26				The outbreak can be considered to have converged during the flight.
2019-10-17	4	363	27				The outbreak can be considered to have converged during the flight.
2019-10-17	4	364	28				Bacterial culture is needed to determine which of the two meals (supper or snack) is the cause.
2019-10-17	4	365	29				Bacterial culture is needed to determine which of the two meals (supper or snack) is the cause.
2019-10-17	4	366	30				The incubation time is at most around 30 hours.
2019-10-17	4	367	31				The outbreak can be considered to have converged during the flight.
2019-10-17	4	368	32				The outbreak can be considered to have converged during the flight.
2019-10-17	4	369	33				The outbreak can be considered to have converged during the flight.
2019-10-17	4	370	34				The outbreak can be considered to have converged during the flight.
2019-10-17	4	371	35				The outbreak can be considered to have converged during the flight.
2019-10-17	4	372	36				The outbreak can be considered to have converged during the flight.
2019-10-17	4	373	37				The outbreak can be considered to have converged during the flight.
2019-10-17	4	374	38				Bacterial culture is needed to determine which of the two meals (supper or snack) is the cause.
2019-10-17	4	375	39				The outbreak can be considered to have converged during the flight.
2019-10-17	4	376	40				The outbreak can be considered to have converged during the flight.
2019-10-17	4	377	41				The outbreak can be considered to have converged during the flight.
2019-10-17	4	378	42				Bacterial culture is needed to determine which of the two meals (supper or snack) is the cause.
2019-10-17	4	379	43				The outbreak can be considered to have converged during the flight.
2019-10-17	4	380	44				The outbreak can be considered to have converged during the flight.
2019-10-17	4	381	45				Bacterial culture is needed to determine which of the two meals (supper or snack) is the cause.
2019-10-17	4	382	46				The incubation time is at most around 30 hours.
2019-10-17	4	383	47				The outbreak can be considered to have converged during the flight.
2019-10-17	4	384	48				The outbreak can be considered to have converged during the flight.
2019-10-17	4	385	49				The outbreak can be considered to have converged during the flight.
2019-10-17	4	386	50				The outbreak can be considered to have converged during the flight.
2019-10-17	4	387	51				The incubation time is at most around 30 hours.
2019-10-17	4	388	52				Bacterial culture is needed to determine which of the two meals (supper or snack) is the cause.
2019-10-17	4	389	53				The outbreak can be considered to have converged during the flight.
2019-10-17	4	390	54				The outbreak can be considered to have converged during the flight.
2019-10-17	4	391	55				The incubation time is at most around 30 hours.
2019-10-17	4	392	56				The outbreak can be considered to have converged during the flight.
2019-10-17	4	393	57				Bacterial culture is needed to determine which of the two meals (supper or snack) is the cause.
2019-10-17	4	394	58				Outbreak was with a single exposure.
2019-10-17	4	395	59				The outbreak can be considered to have converged during the flight.
2019-10-17	4	396	60				Outbreak was with a single exposure.
2019-10-17	4	397	61				Bacterial culture is needed to determine which of the two meals (supper or snack) is the cause.
2019-10-17	4	398	62				The outbreak can be considered to have converged during the flight.
2019-10-17	4	399	63				The incubation time is at most around 30 hours.
2019-10-17	4	400	64				The outbreak can be considered to have converged during the flight.
2019-10-17	4	401	65				The incubation time is at most around 30 hours.
2019-10-17	4	402	66				The outbreak can be considered to have converged during the flight.
2019-10-17	4	403	67				Bacterial culture is needed to determine which of the two meals (supper or snack) is the cause.
2019-10-17	4	404	68				Bacterial culture is needed to determine which of the two meals (supper or snack) is the cause.
2019-10-17	4	405	69				The outbreak can be considered to have converged during the flight.
2019-10-17	4	406	70				The outbreak can be considered to have converged during the flight.
2019-10-17	4	407	71				The outbreak can be considered to have converged during the flight.
2019-10-17	4	408	72				Outbreak was with a single exposure.
2019-10-17	4	409	73				The outbreak can be considered to have converged during the flight.
2019-10-17	4	410	74				The outbreak can be considered to have converged during the flight.
2019-10-17	4	411	75				The outbreak can be considered to have converged during the flight.
2019-10-17	4	412	76				The outbreak can be considered to have converged during the flight.
2019-10-17	4	413	77				The outbreak can be considered to have converged during the flight.
2019-10-17	4	414	78				The outbreak can be considered to have converged during the flight.
2019-10-17	4	415	79				The outbreak can be considered to have converged during the flight.
2019-10-17	4	416	80				Bacterial culture is needed to determine which of the two meals (supper or snack) is the cause.
2019-10-17	4	417	81				The outbreak can be considered to have converged during the flight.
2019-10-17	4	418	82				The outbreak can be considered to have converged during the flight.
2019-10-17	4	419	83				The outbreak can be considered to have converged during the flight.
2019-10-17	4	420	84				The outbreak can be considered to have converged during the flight.
2019-10-17	4	421	85				The outbreak can be considered to have converged during the flight.
2019-10-17	4	422	86				The incubation time is at most around 30 hours.
2019-10-17	4	423	87				The outbreak can be considered to have converged during the flight.
2019-10-17	4	424	88				The outbreak can be considered to have converged during the flight.
2019-10-17	4	425	89				The outbreak can be considered to have converged during the flight.
2019-10-17	4	426	90				The outbreak can be considered to have converged during the flight.
2019-10-17	4	427	91				The incubation time is at most around 30 hours.
2019-10-17	4	428	92				The outbreak can be considered to have converged during the flight.
2019-10-17	4	429	93				The outbreak can be considered to have converged during the flight.
2019-10-17	4	430	94				The outbreak can be considered to have converged during the flight.
2019-10-17	4	431	95				The incubation time is at most around 30 hours.
2019-10-17	4	432	96				The outbreak can be considered to have converged during the flight.
2019-10-17	4	433	97				The outbreak can be considered to have converged during the flight.
2019-10-17	4	434	98				Outbreak was with a single exposure.
2019-10-17	4	435	99				Bacterial culture is needed to determine which of the two meals (supper or snack) is the cause.
2019-10-17	4	436	100				The outbreak can be considered to have converged during the flight.
2019-10-17	4	437	101				The outbreak can be considered to have converged during the flight.
2019-10-17	4	438	102				Bacterial culture is needed to determine which of the two meals (supper or snack) is the cause.
2019-10-17	4	439	103				The outbreak can be considered to have converged during the flight.
2019-10-17	4	440	104				Bacterial culture is needed to determine which of the two meals (supper or snack) is the cause.
2019-10-17	4	441	105				The outbreak can be considered to have converged during the flight.
2019-10-17	4	442	106				The incubation time is at most around 30 hours.
2019-10-17	4	443	107				Outbreak was with a single exposure.
2019-10-17	5	444	1					Out of a total of 300, 92 pregnant women were taking the drug, which is unusually high proportion (0.31).
2019-10-17	5	445	2					The exposure odds of cases (4.09) are unusually higher than those of controls (0.01).
2019-10-17	5	446	3					Out of a total of 300, 92 pregnant women were taking the drug, which is unusually high proportion (0.31).
2019-10-17	5	447	4					Out of a total of 300, 92 pregnant women were taking the drug, which is unusually high proportion (0.31).
2019-10-17	5	448	5					Out of a total of 300, 92 pregnant women were taking the drug, which is unusually high proportion (0.31).
2019-10-17	5	449	6					There are neonatal malformations in 22 pregnant women without taking the drug, which is unusually high proportion (0.11).
2019-10-17	5	450	7					The exposure odds of cases (4.09) are unusually higher than those of controls (0.01).
2019-10-17	5	451	8					There are neonatal malformations in 22 pregnant women without taking the drug, which is unusually high proportion (0.11).
2019-10-17	5	452	9					The exposure odds of cases (4.09) are unusually higher than those of controls (0.01).
2019-10-17	5	453	10					There are neonatal malformations in 22 pregnant women without taking the drug, which is unusually high proportion (0.11).
2019-10-17	5	454	11					The exposure odds of cases (4.09) are unusually higher than those of controls (0.01).
2019-10-17	5	455	12					Out of a total of 300, 92 pregnant women were taking the drug, which is unusually high proportion (0.31).
2019-10-17	5	456	13					Because the prevalence of neonatal malformations (0.37) is abnormally high, odds ratios do not approximate risk ratios.
2019-10-17	5	457	14					Out of a total of 300, 92 pregnant women were taking the drug, which is unusually high proportion (0.31).
2019-10-17	5	458	15					The exposure odds of cases (4.09) are unusually higher than those of controls (0.01).
2019-10-17	5	459	16					There are neonatal malformations in 22 pregnant women without taking the drug, which is unusually high proportion (0.11).
2019-10-17	5	460	17					Out of a total of 300, 92 pregnant women were taking the drug, which is unusually high proportion (0.31).
2019-10-17	5	461	18					The exposure odds of cases (4.09) are unusually higher than those of controls (0.01).
2019-10-17	5	462	19					The exposure odds of cases (4.09) are unusually higher than those of controls (0.01).
2019-10-17	5	463	20					Because the prevalence of neonatal malformations (0.37) is abnormally high, odds ratios do not approximate risk ratios.
2019-10-17	5	464	21					Out of a total of 300, 92 pregnant women were taking the drug, which is unusually high proportion (0.31).
2019-10-17	5	465	22					Out of a total of 300, 92 pregnant women were taking the drug, which is unusually high proportion (0.31).
2019-10-17	5	466	23					The exposure odds of cases (4.09) are unusually higher than those of controls (0.01).
2019-10-17	5	467	24					The exposure odds of cases (4.09) are unusually higher than those of controls (0.01).
2019-10-17	5	468	25					Out of a total of 300, 92 pregnant women were taking the drug, which is unusually high proportion (0.31).
2019-10-17	5	469	26					The exposure odds of cases (4.09) are unusually higher than those of controls (0.01).
2019-10-17	5	470	27					Out of a total of 300, 92 pregnant women were taking the drug, which is unusually high proportion (0.31).
2019-10-17	5	471	28					There are neonatal malformations in 22 pregnant women without taking the drug, which is unusually high proportion (0.11).
2019-10-17	5	472	29					Out of a total of 300, 92 pregnant women were taking the drug, which is unusually high proportion (0.31).
2019-10-17	5	473	30					Out of a total of 300, 92 pregnant women were taking the drug, which is unusually high proportion (0.31).
2019-10-17	5	474	31					Out of a total of 300, 92 pregnant women were taking the drug, which is unusually high proportion (0.31).
2019-10-17	5	475	32					There are neonatal malformations in 22 pregnant women without taking the drug, which is unusually high proportion (0.11).
2019-10-17	5	476	33					The exposure odds of cases (4.09) are unusually higher than those of controls (0.01).
2019-10-17	5	477	34					Out of a total of 300, 92 pregnant women were taking the drug, which is unusually high proportion (0.31).
2019-10-17	5	478	35					Out of a total of 300, 92 pregnant women were taking the drug, which is unusually high proportion (0.31).
2019-10-17	5	479	36					The exposure odds of cases (4.09) are unusually higher than those of controls (0.01).
2019-10-17	5	480	37					The exposure odds of cases (4.09) are unusually higher than those of controls (0.01).
2019-10-17	5	481	38					The exposure odds of cases (4.09) are unusually higher than those of controls (0.01).
2019-10-17	5	482	39					Because the prevalence of neonatal malformations (0.37) is abnormally high, odds ratios do not approximate risk ratios.
2019-10-17	5	483	40					Because the prevalence of neonatal malformations (0.37) is abnormally high, odds ratios do not approximate risk ratios.
2019-10-17	5	484	41					Out of a total of 300, 92 pregnant women were taking the drug, which is unusually high proportion (0.31).
2019-10-17	5	485	42					There are neonatal malformations in 22 pregnant women without taking the drug, which is unusually high proportion (0.11).
2019-10-17	5	486	43					Because the prevalence of neonatal malformations (0.37) is abnormally high, odds ratios do not approximate risk ratios.
2019-10-17	5	487	44					The exposure odds of cases (4.09) are unusually higher than those of controls (0.01).
2019-10-17	5	488	45					The exposure odds of cases (4.09) are unusually higher than those of controls (0.01).
2019-10-17	5	489	46					Because the prevalence of neonatal malformations (0.37) is abnormally high, odds ratios do not approximate risk ratios.
2019-10-17	5	490	47					The exposure odds of cases (4.09) are unusually higher than those of controls (0.01).
2019-10-17	5	491	48					Out of a total of 300, 92 pregnant women were taking the drug, which is unusually high proportion (0.31).
2019-10-17	5	492	49					The exposure odds of cases (4.09) are unusually higher than those of controls (0.01).
2019-10-17	5	493	50					Out of a total of 300, 92 pregnant women were taking the drug, which is unusually high proportion (0.31).
2019-10-17	5	494	51					Out of a total of 300, 92 pregnant women were taking the drug, which is unusually high proportion (0.31).
2019-10-17	5	495	52					Out of a total of 300, 92 pregnant women were taking the drug, which is unusually high proportion (0.31).
2019-10-17	5	496	53					Because the prevalence of neonatal malformations (0.37) is abnormally high, odds ratios do not approximate risk ratios.
2019-10-17	5	497	54					Out of a total of 300, 92 pregnant women were taking the drug, which is unusually high proportion (0.31).
2019-10-17	5	498	55					Because the prevalence of neonatal malformations (0.37) is abnormally high, odds ratios do not approximate risk ratios.
2019-10-17	5	499	56					Out of a total of 300, 92 pregnant women were taking the drug, which is unusually high proportion (0.31).
2019-10-17	5	500	57					Out of a total of 300, 92 pregnant women were taking the drug, which is unusually high proportion (0.31).
2019-10-17	5	501	58					Out of a total of 300, 92 pregnant women were taking the drug, which is unusually high proportion (0.31).
2019-10-17	5	502	59					The exposure odds of cases (4.09) are unusually higher than those of controls (0.01).
2019-10-17	5	503	60					The exposure odds of cases (4.09) are unusually higher than those of controls (0.01).
2019-10-17	5	504	61					There are neonatal malformations in 22 pregnant women without taking the drug, which is unusually high proportion (0.11).
2019-10-17	5	505	62					The exposure odds of cases (4.09) are unusually higher than those of controls (0.01).
2019-10-17	5	506	63					Out of a total of 300, 92 pregnant women were taking the drug, which is unusually high proportion (0.31).
2019-10-17	5	507	64					Out of a total of 300, 92 pregnant women were taking the drug, which is unusually high proportion (0.31).
2019-10-17	5	508	65					Out of a total of 300, 92 pregnant women were taking the drug, which is unusually high proportion (0.31).
2019-10-17	5	509	66					The exposure odds of cases (4.09) are unusually higher than those of controls (0.01).
2019-10-17	5	510	67					The exposure odds of cases (4.09) are unusually higher than those of controls (0.01).
2019-10-17	5	511	68					There are neonatal malformations in 22 pregnant women without taking the drug, which is unusually high proportion (0.11).
2019-10-17	5	512	69					Out of a total of 300, 92 pregnant women were taking the drug, which is unusually high proportion (0.31).
2019-10-17	5	513	70					The exposure odds of cases (4.09) are unusually higher than those of controls (0.01).
2019-10-17	5	514	71					Because the prevalence of neonatal malformations (0.37) is abnormally high, odds ratios do not approximate risk ratios.
2019-10-17	5	515	72					Out of a total of 300, 92 pregnant women were taking the drug, which is unusually high proportion (0.31).
2019-10-17	5	516	73					The exposure odds of cases (4.09) are unusually higher than those of controls (0.01).
2019-10-17	5	517	74					Out of a total of 300, 92 pregnant women were taking the drug, which is unusually high proportion (0.31).
2019-10-17	5	518	75					Out of a total of 300, 92 pregnant women were taking the drug, which is unusually high proportion (0.31).
2019-10-17	5	519	76					The exposure odds of cases (4.09) are unusually higher than those of controls (0.01).
2019-10-17	5	520	77					Out of a total of 300, 92 pregnant women were taking the drug, which is unusually high proportion (0.31).
2019-10-17	5	521	78					Because the prevalence of neonatal malformations (0.37) is abnormally high, odds ratios do not approximate risk ratios.
2019-10-17	5	522	79					There are neonatal malformations in 22 pregnant women without taking the drug, which is unusually high proportion (0.11).
2019-10-17	5	523	80					The exposure odds of cases (4.09) are unusually higher than those of controls (0.01).
2019-10-17	5	524	81					Out of a total of 300, 92 pregnant women were taking the drug, which is unusually high proportion (0.31).
2019-10-17	5	525	82					Because the prevalence of neonatal malformations (0.37) is abnormally high, odds ratios do not approximate risk ratios.
2019-10-17	5	526	83					Because the prevalence of neonatal malformations (0.37) is abnormally high, odds ratios do not approximate risk ratios.
2019-10-17	5	527	84					Because the prevalence of neonatal malformations (0.37) is abnormally high, odds ratios do not approximate risk ratios.
2019-10-17	5	528	85					There are neonatal malformations in 22 pregnant women without taking the drug, which is unusually high proportion (0.11).
2019-10-17	5	529	86					There are neonatal malformations in 22 pregnant women without taking the drug, which is unusually high proportion (0.11).
2019-10-17	5	530	87					Out of a total of 300, 92 pregnant women were taking the drug, which is unusually high proportion (0.31).
2019-10-17	5	531	88					The exposure odds of cases (4.09) are unusually higher than those of controls (0.01).
2019-10-17	5	532	89					Because the prevalence of neonatal malformations (0.37) is abnormally high, odds ratios do not approximate risk ratios.
2019-10-17	5	533	90					Because the prevalence of neonatal malformations (0.37) is abnormally high, odds ratios do not approximate risk ratios.
2019-10-17	5	534	91					Because the prevalence of neonatal malformations (0.37) is abnormally high, odds ratios do not approximate risk ratios.
2019-10-17	5	535	92					Out of a total of 300, 92 pregnant women were taking the drug, which is unusually high proportion (0.31).
2019-10-17	5	536	93					Out of a total of 300, 92 pregnant women were taking the drug, which is unusually high proportion (0.31).
2019-10-17	5	537	94					Because the prevalence of neonatal malformations (0.37) is abnormally high, odds ratios do not approximate risk ratios.
2019-10-17	5	538	95					Out of a total of 300, 92 pregnant women were taking the drug, which is unusually high proportion (0.31).
2019-10-17	5	539	96					Out of a total of 300, 92 pregnant women were taking the drug, which is unusually high proportion (0.31).
2019-10-17	5	540	97					The exposure odds of cases (4.09) are unusually higher than those of controls (0.01).
2019-10-17	5	541	98					The exposure odds of cases (4.09) are unusually higher than those of controls (0.01).
2019-10-17	5	542	99					There are neonatal malformations in 22 pregnant women without taking the drug, which is unusually high proportion (0.11).
2019-10-17	5	543	100					There are neonatal malformations in 22 pregnant women without taking the drug, which is unusually high proportion (0.11).
2019-10-17	5	544	101					The exposure odds of cases (4.09) are unusually higher than those of controls (0.01).
2019-10-17	5	545	102					The exposure odds of cases (4.09) are unusually higher than those of controls (0.01).
2019-10-17	5	546	103					The exposure odds of cases (4.09) are unusually higher than those of controls (0.01).
2019-10-17	5	547	104					Out of a total of 300, 92 pregnant women were taking the drug, which is unusually high proportion (0.31).
2019-10-17	5	548	105					Out of a total of 300, 92 pregnant women were taking the drug, which is unusually high proportion (0.31).
2019-10-17	5	549	106					Out of a total of 300, 92 pregnant women were taking the drug, which is unusually high proportion (0.31).
2019-10-17	5	550	107					The exposure odds of cases (4.09) are unusually higher than those of controls (0.01).
2019-10-17	5	551	108					The exposure odds of cases (4.09) are unusually higher than those of controls (0.01).
2019-10-17	5	552	109					The exposure odds of cases (4.09) are unusually higher than those of controls (0.01).
2019-10-17	5	553	110					Because the prevalence of neonatal malformations (0.37) is abnormally high, odds ratios do not approximate risk ratios.
2019-10-17	5	554	111					There are neonatal malformations in 22 pregnant women without taking the drug, which is unusually high proportion (0.11).
2019-10-17	5	555	112					Because the prevalence of neonatal malformations (0.37) is abnormally high, odds ratios do not approximate risk ratios.
2019-10-17	5	556	113					Because the prevalence of neonatal malformations (0.37) is abnormally high, odds ratios do not approximate risk ratios.
2019-10-17	5	557	114					Out of a total of 300, 92 pregnant women were taking the drug, which is unusually high proportion (0.31).
2019-10-17	5	558	115					Out of a total of 300, 92 pregnant women were taking the drug, which is unusually high proportion (0.31).
2019-10-17	5	559	116					The exposure odds of cases (4.09) are unusually higher than those of controls (0.01).
2019-10-17	6	560	1						The exposure odds of cases (4.09) are unusually higher than those of controls (0.01).
2019-10-17	6	561	2						The exposure odds of cases (4.09) are unusually higher than those of controls (0.01).
2019-10-17	6	562	3						Because the prevalence of neonatal malformations (0.37) is abnormally high, odds ratios do not approximate risk ratios.
2019-10-17	6	563	4						Because the prevalence of neonatal malformations (0.37) is abnormally high, odds ratios do not approximate risk ratios.
2019-10-17	6	564	5						The exposure odds of cases (4.09) are unusually higher than those of controls (0.01).
2019-10-17	6	565	6						The exposure odds of cases (4.09) are unusually higher than those of controls (0.01).
2019-10-17	6	566	7						The exposure odds of cases (4.09) are unusually higher than those of controls (0.01).
2019-10-17	6	567	8						The exposure odds of cases (4.09) are unusually higher than those of controls (0.01).
2019-10-17	6	568	9						The exposure odds of cases (4.09) are unusually higher than those of controls (0.01).
2019-10-17	6	569	10						The exposure odds of cases (4.09) are unusually higher than those of controls (0.01).
2019-10-17	6	570	11						Because the prevalence of neonatal malformations (0.37) is abnormally high, odds ratios do not approximate risk ratios.
2019-10-17	6	571	12						The exposure odds of cases (4.09) are unusually higher than those of controls (0.01).
2019-10-17	6	572	13						The exposure odds of cases (4.09) are unusually higher than those of controls (0.01).
2019-10-17	6	573	14						The exposure odds of cases (4.09) are unusually higher than those of controls (0.01).
2019-10-17	6	574	15						The exposure odds of cases (4.09) are unusually higher than those of controls (0.01).
2019-10-17	6	575	16						Because the prevalence of neonatal malformations (0.37) is abnormally high, odds ratios do not approximate risk ratios.
2019-10-17	6	576	17						The exposure odds of cases (4.09) are unusually higher than those of controls (0.01).
2019-10-17	6	577	18						The exposure odds of cases (4.09) are unusually higher than those of controls (0.01).
2019-10-17	6	578	19						There are neonatal malformations in 22 pregnant women without taking the drug, which is unusually high proportion (0.11).
2019-10-17	6	579	20						Because the prevalence of neonatal malformations (0.37) is abnormally high, odds ratios do not approximate risk ratios.
2019-10-17	6	580	21						The exposure odds of cases (4.09) are unusually higher than those of controls (0.01).
2019-10-17	6	581	22						Because the prevalence of neonatal malformations (0.37) is abnormally high, odds ratios do not approximate risk ratios.
2019-10-17	6	582	23						Because the prevalence of neonatal malformations (0.37) is abnormally high, odds ratios do not approximate risk ratios.
2019-10-17	6	583	24						There are neonatal malformations in 22 pregnant women without taking the drug, which is unusually high proportion (0.11).
2019-10-17	6	584	25						The exposure odds of cases (4.09) are unusually higher than those of controls (0.01).
2019-10-17	6	585	26						The exposure odds of cases (4.09) are unusually higher than those of controls (0.01).
2019-10-17	6	586	27						There are neonatal malformations in 22 pregnant women without taking the drug, which is unusually high proportion (0.11).
2019-10-17	6	587	28						The exposure odds of cases (4.09) are unusually higher than those of controls (0.01).
2019-10-17	6	588	29						The exposure odds of cases (4.09) are unusually higher than those of controls (0.01).
2019-10-17	6	589	30						The exposure odds of cases (4.09) are unusually higher than those of controls (0.01).
2019-10-17	6	590	31						Because the prevalence of neonatal malformations (0.37) is abnormally high, odds ratios do not approximate risk ratios.
2019-10-17	6	591	32						Because the prevalence of neonatal malformations (0.37) is abnormally high, odds ratios do not approximate risk ratios.
2019-10-17	6	592	33						The exposure odds of cases (4.09) are unusually higher than those of controls (0.01).
2019-10-17	6	593	34						The exposure odds of cases (4.09) are unusually higher than those of controls (0.01).
2019-10-17	6	594	35						The exposure odds of cases (4.09) are unusually higher than those of controls (0.01).
2019-10-17	6	595	36						The exposure odds of cases (4.09) are unusually higher than those of controls (0.01).
2019-10-17	6	596	37						The exposure odds of cases (4.09) are unusually higher than those of controls (0.01).
2019-10-17	6	597	38						The exposure odds of cases (4.09) are unusually higher than those of controls (0.01).
2019-10-17	6	598	39						The exposure odds of cases (4.09) are unusually higher than those of controls (0.01).
2019-10-17	6	599	40						The exposure odds of cases (4.09) are unusually higher than those of controls (0.01).
2019-10-17	6	600	41						The exposure odds of cases (4.09) are unusually higher than those of controls (0.01).
2019-10-17	6	601	42						The exposure odds of cases (4.09) are unusually higher than those of controls (0.01).
2019-10-17	6	602	43						The exposure odds of cases (4.09) are unusually higher than those of controls (0.01).
2019-10-17	6	603	44						The exposure odds of cases (4.09) are unusually higher than those of controls (0.01).
2019-10-17	6	604	45						The exposure odds of cases (4.09) are unusually higher than those of controls (0.01).
2019-10-17	6	605	46						The exposure odds of cases (4.09) are unusually higher than those of controls (0.01).
2019-10-17	6	606	47						The exposure odds of cases (4.09) are unusually higher than those of controls (0.01).
2019-10-17	6	607	48						The exposure odds of cases (4.09) are unusually higher than those of controls (0.01).
2019-10-17	6	608	49						The exposure odds of cases (4.09) are unusually higher than those of controls (0.01).
2019-10-17	6	609	50						The exposure odds of cases (4.09) are unusually higher than those of controls (0.01).
2019-10-17	6	610	51						The exposure odds of cases (4.09) are unusually higher than those of controls (0.01).
2019-10-17	6	611	52						Because the prevalence of neonatal malformations (0.37) is abnormally high, odds ratios do not approximate risk ratios.
2019-10-17	6	612	53						Because the prevalence of neonatal malformations (0.37) is abnormally high, odds ratios do not approximate risk ratios.
2019-10-17	6	613	54						The exposure odds of cases (4.09) are unusually higher than those of controls (0.01).
2019-10-17	6	614	55						The exposure odds of cases (4.09) are unusually higher than those of controls (0.01).
2019-10-17	6	615	56						The exposure odds of cases (4.09) are unusually higher than those of controls (0.01).
2019-10-17	6	616	57						Because the prevalence of neonatal malformations (0.37) is abnormally high, odds ratios do not approximate risk ratios.
2019-10-17	6	617	58						The exposure odds of cases (4.09) are unusually higher than those of controls (0.01).
2019-10-17	6	618	59						The exposure odds of cases (4.09) are unusually higher than those of controls (0.01).
2019-10-17	6	619	60						The exposure odds of cases (4.09) are unusually higher than those of controls (0.01).
2019-10-17	6	620	61						The exposure odds of cases (4.09) are unusually higher than those of controls (0.01).
2019-10-17	6	621	62						The exposure odds of cases (4.09) are unusually higher than those of controls (0.01).
2019-10-17	6	622	63						The exposure odds of cases (4.09) are unusually higher than those of controls (0.01).
2019-10-17	6	623	64						The exposure odds of cases (4.09) are unusually higher than those of controls (0.01).
2019-10-17	6	624	65						The exposure odds of cases (4.09) are unusually higher than those of controls (0.01).
2019-10-17	6	625	66						The exposure odds of cases (4.09) are unusually higher than those of controls (0.01).
2019-10-17	6	626	67						The exposure odds of cases (4.09) are unusually higher than those of controls (0.01).
2019-10-17	6	627	68						The exposure odds of cases (4.09) are unusually higher than those of controls (0.01).
2019-10-17	6	628	69						The exposure odds of cases (4.09) are unusually higher than those of controls (0.01).
2019-10-17	6	629	70						Because the prevalence of neonatal malformations (0.37) is abnormally high, odds ratios do not approximate risk ratios.
2019-10-17	6	630	71						The exposure odds of cases (4.09) are unusually higher than those of controls (0.01).
2019-10-17	6	631	72						Because the prevalence of neonatal malformations (0.37) is abnormally high, odds ratios do not approximate risk ratios.
2019-10-17	6	632	73						The exposure odds of cases (4.09) are unusually higher than those of controls (0.01).
2019-10-17	6	633	74						The exposure odds of cases (4.09) are unusually higher than those of controls (0.01).
2019-10-17	6	634	75						The exposure odds of cases (4.09) are unusually higher than those of controls (0.01).
2019-10-17	6	635	76						The exposure odds of cases (4.09) are unusually higher than those of controls (0.01).
2019-10-17	6	636	77						Because the prevalence of neonatal malformations (0.37) is abnormally high, odds ratios do not approximate risk ratios.
2019-10-17	6	637	78						The exposure odds of cases (4.09) are unusually higher than those of controls (0.01).
2019-10-17	6	638	79						The exposure odds of cases (4.09) are unusually higher than those of controls (0.01).
2019-10-17	6	639	80						The exposure odds of cases (4.09) are unusually higher than those of controls (0.01).
2019-10-17	6	640	81						The exposure odds of cases (4.09) are unusually higher than those of controls (0.01).
2019-10-17	6	641	82						The exposure odds of cases (4.09) are unusually higher than those of controls (0.01).
2019-10-17	6	642	83						The exposure odds of cases (4.09) are unusually higher than those of controls (0.01).
2019-10-17	6	643	84						The exposure odds of cases (4.09) are unusually higher than those of controls (0.01).
2019-10-17	6	644	85						The exposure odds of cases (4.09) are unusually higher than those of controls (0.01).
2019-10-17	6	645	86						The exposure odds of cases (4.09) are unusually higher than those of controls (0.01).
2019-10-17	6	646	87						The exposure odds of cases (4.09) are unusually higher than those of controls (0.01).
2019-10-17	6	647	88						There are neonatal malformations in 22 pregnant women without taking the drug, which is unusually high proportion (0.11).
2019-10-17	6	648	89						Because the prevalence of neonatal malformations (0.37) is abnormally high, odds ratios do not approximate risk ratios.
2019-10-17	6	649	90						Because the prevalence of neonatal malformations (0.37) is abnormally high, odds ratios do not approximate risk ratios.
2019-10-17	6	650	91						Because the prevalence of neonatal malformations (0.37) is abnormally high, odds ratios do not approximate risk ratios.
2019-10-17	6	651	92						The exposure odds of cases (4.09) are unusually higher than those of controls (0.01).
2019-10-17	6	652	93						The exposure odds of cases (4.09) are unusually higher than those of controls (0.01).
2019-10-17	6	653	94						Because the prevalence of neonatal malformations (0.37) is abnormally high, odds ratios do not approximate risk ratios.
2019-10-17	6	654	95						The exposure odds of cases (4.09) are unusually higher than those of controls (0.01).
2019-10-17	6	655	96						The exposure odds of cases (4.09) are unusually higher than those of controls (0.01).
2019-10-17	6	656	97						The exposure odds of cases (4.09) are unusually higher than those of controls (0.01).
2019-10-17	6	657	98						The exposure odds of cases (4.09) are unusually higher than those of controls (0.01).
2019-10-17	6	658	99						The exposure odds of cases (4.09) are unusually higher than those of controls (0.01).
2019-10-17	6	659	100						Out of a total of 300, 92 pregnant women were taking the drug, which is unusually high proportion (0.31).
2019-10-17	6	660	101						The exposure odds of cases (4.09) are unusually higher than those of controls (0.01).
2019-10-17	6	661	102						The exposure odds of cases (4.09) are unusually higher than those of controls (0.01).
2019-10-17	6	662	103						The exposure odds of cases (4.09) are unusually higher than those of controls (0.01).
2019-10-17	6	663	104						The exposure odds of cases (4.09) are unusually higher than those of controls (0.01).
2019-10-17	6	664	105						The exposure odds of cases (4.09) are unusually higher than those of controls (0.01).
2019-10-17	6	665	106						The exposure odds of cases (4.09) are unusually higher than those of controls (0.01).
2019-10-17	6	666	107						Because the prevalence of neonatal malformations (0.37) is abnormally high, odds ratios do not approximate risk ratios.
2019-10-17	6	667	108						The exposure odds of cases (4.09) are unusually higher than those of controls (0.01).
2019-10-17	6	668	109						The exposure odds of cases (4.09) are unusually higher than those of controls (0.01).
2019-10-17	6	669	110						The exposure odds of cases (4.09) are unusually higher than those of controls (0.01).
2019-10-17	6	670	111						Because the prevalence of neonatal malformations (0.37) is abnormally high, odds ratios do not approximate risk ratios.
2019-10-17	6	671	112						The exposure odds of cases (4.09) are unusually higher than those of controls (0.01).
2019-10-17	6	672	113						The exposure odds of cases (4.09) are unusually higher than those of controls (0.01).
2019-10-17	6	673	114						Out of a total of 300, 92 pregnant women were taking the drug, which is unusually high proportion (0.31).
2019-10-17	6	674	115						The exposure odds of cases (4.09) are unusually higher than those of controls (0.01).
2019-10-17	6	675	116						The exposure odds of cases (4.09) are unusually higher than those of controls (0.01).
2019-10-17	6	676	117						The exposure odds of cases (4.09) are unusually higher than those of controls (0.01).
2019-10-17	6	677	118						The exposure odds of cases (4.09) are unusually higher than those of controls (0.01).
2019-10-17	6	678	119						The exposure odds of cases (4.09) are unusually higher than those of controls (0.01).
2019-10-17	6	679	120						Because the prevalence of neonatal malformations (0.37) is abnormally high, odds ratios do not approximate risk ratios.
2019-10-17	7	680	1							If the same study was performed 100 times and 95% confidence intervals were calculated 100 times, 95 intervals included the interval 0.72 to 2.05.
2019-10-17	7	681	2							It is not known whether the true value of the “risk ratio of underexercises to cancer” falls in the interval 0.72 to 2.05.
2019-10-17	7	682	3							It is not known whether the true value of the “risk ratio of underexercises to cancer” falls in the interval 0.72 to 2.05.
2019-10-17	7	683	4							If the same study was performed 100 times and 95% confidence intervals were calculated 100 times, 95 intervals included the interval 0.72 to 2.05.
2019-10-17	7	684	5							If the same study was performed 100 times and 95% confidence intervals were calculated 100 times, 95 intervals included the interval 0.72 to 2.05.
2019-10-17	7	685	6							Underexercises does not increase cancer risk because it is not statistically significant.
2019-10-17	7	686	7							It is not known whether the true value of the “risk ratio of underexercises to cancer” falls in the interval 0.72 to 2.05.
2019-10-17	7	687	8							It is not known whether the true value of the “risk ratio of underexercises to cancer” falls in the interval 0.72 to 2.05.
2019-10-17	7	688	9							If the same study was performed 100 times and 95% confidence intervals were calculated 100 times, 95 intervals included the interval 0.72 to 2.05.
2019-10-17	7	689	10							Underexercises does not increase cancer risk because it is not statistically significant.
2019-10-17	7	690	11							Underexercises does not increase cancer risk because it is not statistically significant.
2019-10-17	7	691	12							It is not known whether the true value of the “risk ratio of underexercises to cancer” falls in the interval 0.72 to 2.05.
2019-10-17	7	692	13							It is not known whether the true value of the “risk ratio of underexercises to cancer” falls in the interval 0.72 to 2.05.
2019-10-17	7	693	14							If the same study was performed 100 times and 95% confidence intervals were calculated 100 times, 95 intervals included the interval 0.72 to 2.05.
2019-10-17	7	694	15							If the same study was performed 100 times and 95% confidence intervals were calculated 100 times, 95 intervals included the interval 0.72 to 2.05.
2019-10-17	7	695	16							Underexercises does not increase cancer risk because it is not statistically significant.
2019-10-17	7	696	17							Underexercises does not increase cancer risk because it is not statistically significant.
2019-10-17	7	697	18							Underexercises does not increase cancer risk because it is not statistically significant.
2019-10-17	7	698	19							If the same study was performed 100 times and 95% confidence intervals were calculated 100 times, 95 intervals included the interval 0.72 to 2.05.
2019-10-17	7	699	20							Underexercises does not increase cancer risk because it is not statistically significant.
2019-10-17	7	700	21							It is not known whether the true value of the “risk ratio of underexercises to cancer” falls in the interval 0.72 to 2.05.
2019-10-17	7	701	22							Underexercises does not increase cancer risk because it is not statistically significant.
2019-10-17	7	702	23							If the same study was performed 100 times and 95% confidence intervals were calculated 100 times, 95 intervals included the interval 0.72 to 2.05.
2019-10-17	7	703	24							It is not known whether the true value of the “risk ratio of underexercises to cancer” falls in the interval 0.72 to 2.05.
2019-10-17	7	704	25							If the same study was performed 100 times and 95% confidence intervals were calculated 100 times, 95 intervals included the interval 0.72 to 2.05.
2019-10-17	7	705	26							If a person becomes underexercise, the risk of getting cancer increases. The risk ratio is included in the interval of 0.72 to 2.05 with a probability of 95%.
2019-10-17	7	706	27							If the same study was performed 100 times and 95% confidence intervals were calculated 100 times, 95 intervals included the interval 0.72 to 2.05.
2019-10-17	7	707	28							Underexercises does not increase cancer risk because it is not statistically significant.
2019-10-17	7	708	29							Underexercises does not increase cancer risk because it is not statistically significant.
2019-10-17	7	709	30							Underexercises does not increase cancer risk because it is not statistically significant.
2019-10-17	7	710	31							It is not known whether the true value of the “risk ratio of underexercises to cancer” falls in the interval 0.72 to 2.05.
2019-10-17	7	711	32							It is not known whether the true value of the “risk ratio of underexercises to cancer” falls in the interval 0.72 to 2.05.
2019-10-17	7	712	33							It is not known whether the true value of the “risk ratio of underexercises to cancer” falls in the interval 0.72 to 2.05.
2019-10-17	7	713	34							Underexercises does not increase cancer risk because it is not statistically significant.
2019-10-17	7	714	35							It is not known whether the true value of the “risk ratio of underexercises to cancer” falls in the interval 0.72 to 2.05.
2019-10-17	7	715	36							If the same study was performed 100 times and 95% confidence intervals were calculated 100 times, 95 intervals included the interval 0.72 to 2.05.
2019-10-17	7	716	37							Underexercises does not increase cancer risk because it is not statistically significant.
2019-10-17	7	717	38							Underexercises does not increase cancer risk because it is not statistically significant.
2019-10-17	7	718	39							It is not known whether the true value of the “risk ratio of underexercises to cancer” falls in the interval 0.72 to 2.05.
2019-10-17	7	719	40							Underexercises does not increase cancer risk because it is not statistically significant.
2019-10-17	7	720	41							If the same study was performed 100 times and 95% confidence intervals were calculated 100 times, 95 intervals included the interval 0.72 to 2.05.
2019-10-17	7	721	42							If the same study was performed 100 times and 95% confidence intervals were calculated 100 times, 95 intervals included the interval 0.72 to 2.05.
2019-10-17	7	722	43							If the same study was performed 100 times and 95% confidence intervals were calculated 100 times, 95 intervals included the interval 0.72 to 2.05.
2019-10-17	7	723	44							It is not known whether the true value of the “risk ratio of underexercises to cancer” falls in the interval 0.72 to 2.05.
2019-10-17	7	724	45							If a person becomes underexercise, the risk of getting cancer increases. The risk ratio is included in the interval of 0.72 to 2.05 with a probability of 95%.
2019-10-17	7	725	46							Underexercises does not increase cancer risk because it is not statistically significant.
2019-10-17	7	726	47							It is not known whether the true value of the “risk ratio of underexercises to cancer” falls in the interval 0.72 to 2.05.
2019-10-17	7	727	48							If the same study was performed 100 times and 95% confidence intervals were calculated 100 times, 95 intervals included the interval 0.72 to 2.05.
2019-10-17	7	728	49							If a person becomes underexercise, the risk of getting cancer increases. The risk ratio is included in the interval of 0.72 to 2.05 with a probability of 95%.
2019-10-17	7	729	50							If the same study was performed 100 times and 95% confidence intervals were calculated 100 times, 95 intervals included the interval 0.72 to 2.05.
2019-10-17	7	730	51							Underexercises does not increase cancer risk because it is not statistically significant.
2019-10-17	7	731	52							Underexercises does not increase cancer risk because it is not statistically significant.
2019-10-17	7	732	53							Underexercises does not increase cancer risk because it is not statistically significant.
2019-10-17	7	733	54							Underexercises does not increase cancer risk because it is not statistically significant.
2019-10-17	7	734	55							It is not known whether the true value of the “risk ratio of underexercises to cancer” falls in the interval 0.72 to 2.05.
2019-10-17	7	735	56							If the same study was performed 100 times and 95% confidence intervals were calculated 100 times, 95 intervals included the interval 0.72 to 2.05.
2019-10-17	7	736	57							Underexercises does not increase cancer risk because it is not statistically significant.
2019-10-17	7	737	58							It is not known whether the true value of the “risk ratio of underexercises to cancer” falls in the interval 0.72 to 2.05.
2019-10-17	7	738	59							It is not known whether the true value of the “risk ratio of underexercises to cancer” falls in the interval 0.72 to 2.05.
2019-10-17	7	739	60							If a person becomes underexercise, the risk of getting cancer increases. The risk ratio is included in the interval of 0.72 to 2.05 with a probability of 95%.
2019-10-17	7	740	61							Underexercises does not increase cancer risk because it is not statistically significant.
2019-10-17	7	741	62							Underexercises does not increase cancer risk because it is not statistically significant.
2019-10-17	7	742	63							Underexercises does not increase cancer risk because it is not statistically significant.
2019-10-17	7	743	64							Underexercises does not increase cancer risk because it is not statistically significant.
2019-10-17	7	744	65							If a person becomes underexercise, the risk of getting cancer increases. The risk ratio is included in the interval of 0.72 to 2.05 with a probability of 95%.
2019-10-17	7	745	66							It is not known whether the true value of the “risk ratio of underexercises to cancer” falls in the interval 0.72 to 2.05.
2019-10-17	7	746	67							It is not known whether the true value of the “risk ratio of underexercises to cancer” falls in the interval 0.72 to 2.05.
2019-10-17	7	747	68							If the same study was performed 100 times and 95% confidence intervals were calculated 100 times, 95 intervals included the interval 0.72 to 2.05.
2019-10-17	7	748	69							If the same study was performed 100 times and 95% confidence intervals were calculated 100 times, 95 intervals included the interval 0.72 to 2.05.
2019-10-17	7	749	70							If the same study was performed 100 times and 95% confidence intervals were calculated 100 times, 95 intervals included the interval 0.72 to 2.05.
2019-10-17	7	750	71							If the same study was performed 100 times and 95% confidence intervals were calculated 100 times, 95 intervals included the interval 0.72 to 2.05.
2019-10-17	7	751	72							If a person becomes underexercise, the risk of getting cancer increases. The risk ratio is included in the interval of 0.72 to 2.05 with a probability of 95%.
2019-10-17	7	752	73							It is not known whether the true value of the “risk ratio of underexercises to cancer” falls in the interval 0.72 to 2.05.
2019-10-17	7	753	74							It is not known whether the true value of the “risk ratio of underexercises to cancer” falls in the interval 0.72 to 2.05.
2019-10-17	7	754	75							If a person becomes underexercise, the risk of getting cancer increases. The risk ratio is included in the interval of 0.72 to 2.05 with a probability of 95%.
2019-10-17	7	755	76							If the same study was performed 100 times and 95% confidence intervals were calculated 100 times, 95 intervals included the interval 0.72 to 2.05.
2019-10-17	7	756	77							It is not known whether the true value of the “risk ratio of underexercises to cancer” falls in the interval 0.72 to 2.05.
2019-10-17	7	757	78							It is not known whether the true value of the “risk ratio of underexercises to cancer” falls in the interval 0.72 to 2.05.
2019-10-17	7	758	79							It is not known whether the true value of the “risk ratio of underexercises to cancer” falls in the interval 0.72 to 2.05.
2019-10-17	7	759	80							If the same study was performed 100 times and 95% confidence intervals were calculated 100 times, 95 intervals included the interval 0.72 to 2.05.
2019-10-17	7	760	81							It is not known whether the true value of the “risk ratio of underexercises to cancer” falls in the interval 0.72 to 2.05.
2019-10-17	7	761	82							It is not known whether the true value of the “risk ratio of underexercises to cancer” falls in the interval 0.72 to 2.05.
2019-10-17	7	762	83							If the same study was performed 100 times and 95% confidence intervals were calculated 100 times, 95 intervals included the interval 0.72 to 2.05.
2019-10-17	7	763	84							Underexercises does not increase cancer risk because it is not statistically significant.
2019-10-17	7	764	85							Underexercises does not increase cancer risk because it is not statistically significant.
2019-10-17	7	765	86							Underexercises does not increase cancer risk because it is not statistically significant.
2019-10-17	7	766	87							It is not known whether the true value of the “risk ratio of underexercises to cancer” falls in the interval 0.72 to 2.05.
2019-10-17	7	767	88							It is not known whether the true value of the “risk ratio of underexercises to cancer” falls in the interval 0.72 to 2.05.
2019-10-17	7	768	89							Underexercises does not increase cancer risk because it is not statistically significant.
2019-10-17	7	769	90							It is not known whether the true value of the “risk ratio of underexercises to cancer” falls in the interval 0.72 to 2.05.
2019-10-17	7	770	91							If the same study was performed 100 times and 95% confidence intervals were calculated 100 times, 95 intervals included the interval 0.72 to 2.05.
2019-10-17	7	771	92							Underexercises does not increase cancer risk because it is not statistically significant.
2019-10-17	7	772	93							It is not known whether the true value of the “risk ratio of underexercises to cancer” falls in the interval 0.72 to 2.05.
2019-10-17	7	773	94							If the same study was performed 100 times and 95% confidence intervals were calculated 100 times, 95 intervals included the interval 0.72 to 2.05.
2019-10-17	7	774	95							Underexercises does not increase cancer risk because it is not statistically significant.
2019-10-17	7	775	96							It is not known whether the true value of the “risk ratio of underexercises to cancer” falls in the interval 0.72 to 2.05.
2019-10-17	7	776	97							It is not known whether the true value of the “risk ratio of underexercises to cancer” falls in the interval 0.72 to 2.05.
2019-10-17	7	777	98							It is not known whether the true value of the “risk ratio of underexercises to cancer” falls in the interval 0.72 to 2.05.
2019-10-17	7	778	99							It is not known whether the true value of the “risk ratio of underexercises to cancer” falls in the interval 0.72 to 2.05.
2019-10-17	7	779	100							If the same study was performed 100 times and 95% confidence intervals were calculated 100 times, 95 intervals included the interval 0.72 to 2.05.
2019-10-17	7	780	101							It is not known whether the true value of the “risk ratio of underexercises to cancer” falls in the interval 0.72 to 2.05.
2019-10-17	7	781	102							If the same study was performed 100 times and 95% confidence intervals were calculated 100 times, 95 intervals included the interval 0.72 to 2.05.
2019-10-17	7	782	103							If the same study was performed 100 times and 95% confidence intervals were calculated 100 times, 95 intervals included the interval 0.72 to 2.05.
2019-10-17	7	783	104							It is not known whether the true value of the “risk ratio of underexercises to cancer” falls in the interval 0.72 to 2.05.
2019-10-17	7	784	105							It is not known whether the true value of the “risk ratio of underexercises to cancer” falls in the interval 0.72 to 2.05.
2019-10-17	7	785	106							If the same study was performed 100 times and 95% confidence intervals were calculated 100 times, 95 intervals included the interval 0.72 to 2.05.
2019-10-17	7	786	107							If a person becomes underexercise, the risk of getting cancer increases. The risk ratio is included in the interval of 0.72 to 2.05 with a probability of 95%.
2019-10-17	8	787	1								If the same study was performed 100 times and 95% confidence intervals were calculated 100 times, 95 intervals included the interval 0.72 to 2.05.
2019-10-17	8	788	2								It is not known whether the true value of the “risk ratio of underexercises to cancer” falls in the interval 0.72 to 2.05.
2019-10-17	8	789	3								It is not known whether the true value of the “risk ratio of underexercises to cancer” falls in the interval 0.72 to 2.05.
2019-10-17	8	790	4								It is not known whether the true value of the “risk ratio of underexercises to cancer” falls in the interval 0.72 to 2.05.
2019-10-17	8	791	5								It is not known whether the true value of the “risk ratio of underexercises to cancer” falls in the interval 0.72 to 2.05.
2019-10-17	8	792	6								It is not known whether the true value of the “risk ratio of underexercises to cancer” falls in the interval 0.72 to 2.05.
2019-10-17	8	793	7								Underexercises does not increase cancer risk because it is not statistically significant.
2019-10-17	8	794	8								It is not known whether the true value of the “risk ratio of underexercises to cancer” falls in the interval 0.72 to 2.05.
2019-10-17	8	795	9								It is not known whether the true value of the “risk ratio of underexercises to cancer” falls in the interval 0.72 to 2.05.
2019-10-17	8	796	10								If the same study was performed 100 times and 95% confidence intervals were calculated 100 times, 95 intervals included the interval 0.72 to 2.05.
2019-10-17	8	797	11								Underexercises does not increase cancer risk because it is not statistically significant.
2019-10-17	8	798	12								It is not known whether the true value of the “risk ratio of underexercises to cancer” falls in the interval 0.72 to 2.05.
2019-10-17	8	799	13								It is not known whether the true value of the “risk ratio of underexercises to cancer” falls in the interval 0.72 to 2.05.
2019-10-17	8	800	14								It is not known whether the true value of the “risk ratio of underexercises to cancer” falls in the interval 0.72 to 2.05.
2019-10-17	8	801	15								If the same study was performed 100 times and 95% confidence intervals were calculated 100 times, 95 intervals included the interval 0.72 to 2.05.
2019-10-17	8	802	16								Underexercises does not increase cancer risk because it is not statistically significant.
2019-10-17	8	803	17								Underexercises does not increase cancer risk because it is not statistically significant.
2019-10-17	8	804	18								It is not known whether the true value of the “risk ratio of underexercises to cancer” falls in the interval 0.72 to 2.05.
2019-10-17	8	805	19								Underexercises does not increase cancer risk because it is not statistically significant.
2019-10-17	8	806	20								It is not known whether the true value of the “risk ratio of underexercises to cancer” falls in the interval 0.72 to 2.05.
2019-10-17	8	807	21								If the same study was performed 100 times and 95% confidence intervals were calculated 100 times, 95 intervals included the interval 0.72 to 2.05.
2019-10-17	8	808	22								It is not known whether the true value of the “risk ratio of underexercises to cancer” falls in the interval 0.72 to 2.05.
2019-10-17	8	809	23								It is not known whether the true value of the “risk ratio of underexercises to cancer” falls in the interval 0.72 to 2.05.
2019-10-17	8	810	24								It is not known whether the true value of the “risk ratio of underexercises to cancer” falls in the interval 0.72 to 2.05.
2019-10-17	8	811	25								It is not known whether the true value of the “risk ratio of underexercises to cancer” falls in the interval 0.72 to 2.05.
2019-10-17	8	812	26								If a person becomes underexercise, the risk of getting cancer increases. The risk ratio is included in the interval of 0.72 to 2.05 with a probability of 95%.
2019-10-17	8	813	27								It is not known whether the true value of the “risk ratio of underexercises to cancer” falls in the interval 0.72 to 2.05.
2019-10-17	8	814	28								It is not known whether the true value of the “risk ratio of underexercises to cancer” falls in the interval 0.72 to 2.05.
2019-10-17	8	815	29								Underexercises does not increase cancer risk because it is not statistically significant.
2019-10-17	8	816	30								It is not known whether the true value of the “risk ratio of underexercises to cancer” falls in the interval 0.72 to 2.05.
2019-10-17	8	817	31								It is not known whether the true value of the “risk ratio of underexercises to cancer” falls in the interval 0.72 to 2.05.
2019-10-17	8	818	32								It is not known whether the true value of the “risk ratio of underexercises to cancer” falls in the interval 0.72 to 2.05.
2019-10-17	8	819	33								If the same study was performed 100 times and 95% confidence intervals were calculated 100 times, 95 intervals included the interval 0.72 to 2.05.
2019-10-17	8	820	34								It is not known whether the true value of the “risk ratio of underexercises to cancer” falls in the interval 0.72 to 2.05.
2019-10-17	8	821	35								It is not known whether the true value of the “risk ratio of underexercises to cancer” falls in the interval 0.72 to 2.05.
2019-10-17	8	822	36								It is not known whether the true value of the “risk ratio of underexercises to cancer” falls in the interval 0.72 to 2.05.
2019-10-17	8	823	37								It is not known whether the true value of the “risk ratio of underexercises to cancer” falls in the interval 0.72 to 2.05.
2019-10-17	8	824	38								It is not known whether the true value of the “risk ratio of underexercises to cancer” falls in the interval 0.72 to 2.05.
2019-10-17	8	825	39								If the same study was performed 100 times and 95% confidence intervals were calculated 100 times, 95 intervals included the interval 0.72 to 2.05.
2019-10-17	8	826	40								Underexercises does not increase cancer risk because it is not statistically significant.
2019-10-17	8	827	41								It is not known whether the true value of the “risk ratio of underexercises to cancer” falls in the interval 0.72 to 2.05.
2019-10-17	8	828	42								It is not known whether the true value of the “risk ratio of underexercises to cancer” falls in the interval 0.72 to 2.05.
2019-10-17	8	829	43								It is not known whether the true value of the “risk ratio of underexercises to cancer” falls in the interval 0.72 to 2.05.
2019-10-17	8	830	44								If the same study was performed 100 times and 95% confidence intervals were calculated 100 times, 95 intervals included the interval 0.72 to 2.05.
2019-10-17	8	831	45								If the same study was performed 100 times and 95% confidence intervals were calculated 100 times, 95 intervals included the interval 0.72 to 2.05.
2019-10-17	8	832	46								It is not known whether the true value of the “risk ratio of underexercises to cancer” falls in the interval 0.72 to 2.05.
2019-10-17	8	833	47								It is not known whether the true value of the “risk ratio of underexercises to cancer” falls in the interval 0.72 to 2.05.
2019-10-17	8	834	48								It is not known whether the true value of the “risk ratio of underexercises to cancer” falls in the interval 0.72 to 2.05.
2019-10-17	8	835	49								It is not known whether the true value of the “risk ratio of underexercises to cancer” falls in the interval 0.72 to 2.05.
2019-10-17	8	836	50								If a person becomes underexercise, the risk of getting cancer increases. The risk ratio is included in the interval of 0.72 to 2.05 with a probability of 95%.
2019-10-17	8	837	51								It is not known whether the true value of the “risk ratio of underexercises to cancer” falls in the interval 0.72 to 2.05.
2019-10-17	8	838	52								It is not known whether the true value of the “risk ratio of underexercises to cancer” falls in the interval 0.72 to 2.05.
2019-10-17	8	839	53								It is not known whether the true value of the “risk ratio of underexercises to cancer” falls in the interval 0.72 to 2.05.
2019-10-17	8	840	54								It is not known whether the true value of the “risk ratio of underexercises to cancer” falls in the interval 0.72 to 2.05.
2019-10-17	8	841	55								It is not known whether the true value of the “risk ratio of underexercises to cancer” falls in the interval 0.72 to 2.05.
2019-10-17	8	842	56								It is not known whether the true value of the “risk ratio of underexercises to cancer” falls in the interval 0.72 to 2.05.
2019-10-17	8	843	57								If the same study was performed 100 times and 95% confidence intervals were calculated 100 times, 95 intervals included the interval 0.72 to 2.05.
2019-10-17	8	844	58								It is not known whether the true value of the “risk ratio of underexercises to cancer” falls in the interval 0.72 to 2.05.
2019-10-17	8	845	59								It is not known whether the true value of the “risk ratio of underexercises to cancer” falls in the interval 0.72 to 2.05.
2019-10-17	8	846	60								It is not known whether the true value of the “risk ratio of underexercises to cancer” falls in the interval 0.72 to 2.05.
2019-10-17	8	847	61								If the same study was performed 100 times and 95% confidence intervals were calculated 100 times, 95 intervals included the interval 0.72 to 2.05.
2019-10-17	8	848	62								Underexercises does not increase cancer risk because it is not statistically significant.
2019-10-17	8	849	63								It is not known whether the true value of the “risk ratio of underexercises to cancer” falls in the interval 0.72 to 2.05.
2019-10-17	8	850	64								It is not known whether the true value of the “risk ratio of underexercises to cancer” falls in the interval 0.72 to 2.05.
2019-10-17	8	851	65								Underexercises does not increase cancer risk because it is not statistically significant.
2019-10-17	8	852	66								If a person becomes underexercise, the risk of getting cancer increases. The risk ratio is included in the interval of 0.72 to 2.05 with a probability of 95%.
2019-10-17	8	853	67								If a person becomes underexercise, the risk of getting cancer increases. The risk ratio is included in the interval of 0.72 to 2.05 with a probability of 95%.
2019-10-17	8	854	68								It is not known whether the true value of the “risk ratio of underexercises to cancer” falls in the interval 0.72 to 2.05.
2019-10-17	8	855	69								If the same study was performed 100 times and 95% confidence intervals were calculated 100 times, 95 intervals included the interval 0.72 to 2.05.
2019-10-17	8	856	70								It is not known whether the true value of the “risk ratio of underexercises to cancer” falls in the interval 0.72 to 2.05.
2019-10-17	8	857	71								If the same study was performed 100 times and 95% confidence intervals were calculated 100 times, 95 intervals included the interval 0.72 to 2.05.
2019-10-17	8	858	72								It is not known whether the true value of the “risk ratio of underexercises to cancer” falls in the interval 0.72 to 2.05.
2019-10-17	8	859	73								It is not known whether the true value of the “risk ratio of underexercises to cancer” falls in the interval 0.72 to 2.05.
2019-10-17	8	860	74								If the same study was performed 100 times and 95% confidence intervals were calculated 100 times, 95 intervals included the interval 0.72 to 2.05.
2019-10-17	8	861	75								It is not known whether the true value of the “risk ratio of underexercises to cancer” falls in the interval 0.72 to 2.05.
2019-10-17	8	862	76								It is not known whether the true value of the “risk ratio of underexercises to cancer” falls in the interval 0.72 to 2.05.
2019-10-17	8	863	77								If a person becomes underexercise, the risk of getting cancer increases. The risk ratio is included in the interval of 0.72 to 2.05 with a probability of 95%.
2019-10-17	8	864	78								It is not known whether the true value of the “risk ratio of underexercises to cancer” falls in the interval 0.72 to 2.05.
2019-10-17	8	865	79								It is not known whether the true value of the “risk ratio of underexercises to cancer” falls in the interval 0.72 to 2.05.
2019-10-17	8	866	80								It is not known whether the true value of the “risk ratio of underexercises to cancer” falls in the interval 0.72 to 2.05.
2019-10-17	8	867	81								It is not known whether the true value of the “risk ratio of underexercises to cancer” falls in the interval 0.72 to 2.05.
2019-10-17	8	868	82								It is not known whether the true value of the “risk ratio of underexercises to cancer” falls in the interval 0.72 to 2.05.
2019-10-17	8	869	83								It is not known whether the true value of the “risk ratio of underexercises to cancer” falls in the interval 0.72 to 2.05.
2019-10-17	8	870	84								It is not known whether the true value of the “risk ratio of underexercises to cancer” falls in the interval 0.72 to 2.05.
2019-10-17	8	871	85								Underexercises does not increase cancer risk because it is not statistically significant.
2019-10-17	8	872	86								Underexercises does not increase cancer risk because it is not statistically significant.
2019-10-17	8	873	87								It is not known whether the true value of the “risk ratio of underexercises to cancer” falls in the interval 0.72 to 2.05.
2019-10-17	8	874	88								If the same study was performed 100 times and 95% confidence intervals were calculated 100 times, 95 intervals included the interval 0.72 to 2.05.
2019-10-17	8	875	89								It is not known whether the true value of the “risk ratio of underexercises to cancer” falls in the interval 0.72 to 2.05.
2019-10-17	8	876	90								It is not known whether the true value of the “risk ratio of underexercises to cancer” falls in the interval 0.72 to 2.05.
2019-10-17	8	877	91								It is not known whether the true value of the “risk ratio of underexercises to cancer” falls in the interval 0.72 to 2.05.
2019-10-17	8	878	92								If a person becomes underexercise, the risk of getting cancer increases. The risk ratio is included in the interval of 0.72 to 2.05 with a probability of 95%.
2019-10-17	8	879	93								It is not known whether the true value of the “risk ratio of underexercises to cancer” falls in the interval 0.72 to 2.05.
2019-10-17	8	880	94								If a person becomes underexercise, the risk of getting cancer increases. The risk ratio is included in the interval of 0.72 to 2.05 with a probability of 95%.
2019-10-17	8	881	95								It is not known whether the true value of the “risk ratio of underexercises to cancer” falls in the interval 0.72 to 2.05.
2019-10-17	8	882	96								Underexercises does not increase cancer risk because it is not statistically significant.
2019-10-17	8	883	97								It is not known whether the true value of the “risk ratio of underexercises to cancer” falls in the interval 0.72 to 2.05.
2019-10-17	8	884	98								It is not known whether the true value of the “risk ratio of underexercises to cancer” falls in the interval 0.72 to 2.05.
2019-10-17	8	885	99								It is not known whether the true value of the “risk ratio of underexercises to cancer” falls in the interval 0.72 to 2.05.
2019-10-17	8	886	100								It is not known whether the true value of the “risk ratio of underexercises to cancer” falls in the interval 0.72 to 2.05.
2019-10-17	8	887	101								If a person becomes underexercise, the risk of getting cancer increases. The risk ratio is included in the interval of 0.72 to 2.05 with a probability of 95%.
2019-10-17	9	888	1									You will present a poster, "We are investigating the relationship between drug X and depression. Recruting Patients." and recruit the study subjects.
2019-10-17	9	889	2									You will present a poster, "We are investigating the relationship between drug X and depression. Recruting Patients." and recruit the study subjects.
2019-10-17	9	890	3									You will ask for "Please carefully fill out the questionnaire of drug X" to obtain exposure information.
2019-10-17	9	891	4									Those interviewing the subject and gathering outcome information should not know whether they are taking drug X.
2019-10-17	9	892	5									You will present a poster entitled “Recruiting Patients Taking Drug X for study” and recruit the study subjects.
2019-10-17	9	893	6									You will ask for "Please carefully fill out the questionnaire of drug X" to obtain exposure information.
2019-10-17	9	894	7									You will present a poster entitled “Recruiting Patients Taking Drug X for study” and recruit the study subjects.
2019-10-17	9	895	8									You will present a poster entitled “Recruiting Patients Taking Drug X for study” and recruit the study subjects.
2019-10-17	9	896	9									Those interviewing the subject and gathering outcome information should not know whether they are taking drug X.
2019-10-17	9	897	10									You will ask for "Please carefully fill out the questionnaire of drug X" to obtain exposure information.
2019-10-17	9	898	11									Those interviewing the subject and gathering outcome information should not know whether they are taking drug X.
2019-10-17	9	899	12									You will present a poster entitled “Recruiting Patients Taking Drug X for study” and recruit the study subjects.
2019-10-17	9	900	13									You will ask for "Please carefully fill out the questionnaire of drug X" to obtain exposure information.
2019-10-17	9	901	14									You will present a poster entitled “Recruiting Patients Taking Drug X for study” and recruit the study subjects.
2019-10-17	9	902	15									Those interviewing the subject and gathering outcome information should not know whether they are taking drug X.
2019-10-17	9	903	16									Those interviewing the subject and gathering outcome information should not know whether they are taking drug X.
2019-10-17	9	904	17									Those interviewing the subject and gathering outcome information should not know whether they are taking drug X.
2019-10-17	9	905	18									Those interviewing the subject and gathering outcome information should not know whether they are taking drug X.
2019-10-17	9	906	19									You will ask for "Please carefully fill out the questionnaire of drug X" to obtain exposure information.
2019-10-17	9	907	20									You will present a poster entitled “Recruiting Patients Taking Drug X for study” and recruit the study subjects.
2019-10-17	9	908	21									You will present a poster entitled “Recruiting Patients Taking Drug X for study” and recruit the study subjects.
2019-10-17	9	909	22									You will present a poster entitled “Recruiting Patients Taking Drug X for study” and recruit the study subjects.
2019-10-17	9	910	23									You will present a poster entitled “Recruiting Patients Taking Drug X for study” and recruit the study subjects.
2019-10-17	9	911	24									You will ask for "Please carefully fill out the questionnaire of drug X" to obtain exposure information.
2019-10-17	9	912	25									You will present a poster entitled “Recruiting Patients Taking Drug X for study” and recruit the study subjects.
2019-10-17	9	913	26									You will ask for "Please carefully fill out the questionnaire of drug X" to obtain exposure information.
2019-10-17	9	914	27									Those interviewing the subject and gathering outcome information should not know whether they are taking drug X.
2019-10-17	9	915	28									You will present a poster, "We are investigating the relationship between drug X and depression. Recruting Patients." and recruit the study subjects.
2019-10-17	9	916	29									Those interviewing the subject and gathering outcome information should not know whether they are taking drug X.
2019-10-17	9	917	30									Those interviewing the subject and gathering outcome information should not know whether they are taking drug X.
2019-10-17	9	918	31									You will ask for "Please carefully fill out the questionnaire of drug X" to obtain exposure information.
2019-10-17	9	919	32									You will ask for "Please carefully fill out the questionnaire of drug X" to obtain exposure information.
2019-10-17	9	920	33									Those interviewing the subject and gathering outcome information should not know whether they are taking drug X.
2019-10-17	9	921	34									You will ask for "Please carefully fill out the questionnaire of drug X" to obtain exposure information.
2019-10-17	9	922	35									Those interviewing the subject and gathering outcome information should not know whether they are taking drug X.
2019-10-17	9	923	36									You will ask for "Please carefully fill out the questionnaire of drug X" to obtain exposure information.
2019-10-17	9	924	37									You will ask for "Please carefully fill out the questionnaire of drug X" to obtain exposure information.
2019-10-17	9	925	38									You will ask for "Please carefully fill out the questionnaire of drug X" to obtain exposure information.
2019-10-17	9	926	39									Those interviewing the subject and gathering outcome information should not know whether they are taking drug X.
2019-10-17	9	927	40									You will present a poster, "We are investigating the relationship between drug X and depression. Recruting Patients." and recruit the study subjects.
2019-10-17	9	928	41									Those interviewing the subject and gathering outcome information should not know whether they are taking drug X.
2019-10-17	9	929	42									You will ask for "Please carefully fill out the questionnaire of drug X" to obtain exposure information.
2019-10-17	9	930	43									You will present a poster, "We are investigating the relationship between drug X and depression. Recruting Patients." and recruit the study subjects.
2019-10-17	9	931	44									Those interviewing the subject and gathering outcome information should not know whether they are taking drug X.
2019-10-17	9	932	45									You will ask for "Please carefully fill out the questionnaire of drug X" to obtain exposure information.
2019-10-17	9	933	46									You will ask for "Please carefully fill out the questionnaire of drug X" to obtain exposure information.
2019-10-17	9	934	47									You will ask for "Please carefully fill out the questionnaire of drug X" to obtain exposure information.
2019-10-17	9	935	48									You will present a poster, "We are investigating the relationship between drug X and depression. Recruting Patients." and recruit the study subjects.
2019-10-17	9	936	49									You will ask for "Please carefully fill out the questionnaire of drug X" to obtain exposure information.
2019-10-17	9	937	50									You will ask for "Please carefully fill out the questionnaire of drug X" to obtain exposure information.
2019-10-17	9	938	51									Those interviewing the subject and gathering outcome information should not know whether they are taking drug X.
2019-10-17	9	939	52									You will present a poster, "We are investigating the relationship between drug X and depression. Recruting Patients." and recruit the study subjects.
2019-10-17	9	940	53									You will ask for "Please carefully fill out the questionnaire of drug X" to obtain exposure information.
2019-10-17	9	941	54									You will ask for "Please carefully fill out the questionnaire of drug X" to obtain exposure information.
2019-10-17	9	942	55									You will present a poster, "We are investigating the relationship between drug X and depression. Recruting Patients." and recruit the study subjects.
2019-10-17	9	943	56									You will ask for "Please carefully fill out the questionnaire of drug X" to obtain exposure information.
2019-10-17	9	944	57									Those interviewing the subject and gathering outcome information should not know whether they are taking drug X.
2019-10-17	9	945	58									Those interviewing the subject and gathering outcome information should not know whether they are taking drug X.
2019-10-17	9	946	59									Those interviewing the subject and gathering outcome information should not know whether they are taking drug X.
2019-10-17	9	947	60									You will present a poster, "We are investigating the relationship between drug X and depression. Recruting Patients." and recruit the study subjects.
2019-10-17	9	948	61									Those interviewing the subject and gathering outcome information should not know whether they are taking drug X.
2019-10-17	9	949	62									You will ask for "Please carefully fill out the questionnaire of drug X" to obtain exposure information.
2019-10-17	9	950	63									Those interviewing the subject and gathering outcome information should not know whether they are taking drug X.
2019-10-17	9	951	64									Those interviewing the subject and gathering outcome information should not know whether they are taking drug X.
2019-10-17	9	952	65									You will ask for "Please carefully fill out the questionnaire of drug X" to obtain exposure information.
2019-10-17	9	953	66									Those interviewing the subject and gathering outcome information should not know whether they are taking drug X.
2019-10-17	9	954	67									You will ask for "Please carefully fill out the questionnaire of drug X" to obtain exposure information.
2019-10-17	9	955	68									You will ask for "Please carefully fill out the questionnaire of drug X" to obtain exposure information.
2019-10-17	9	956	69									Those interviewing the subject and gathering outcome information should not know whether they are taking drug X.
2019-10-17	9	957	70									You will present a poster entitled “Recruiting Patients Taking Drug X for study” and recruit the study subjects.
2019-10-17	9	958	71									Those interviewing the subject and gathering outcome information should not know whether they are taking drug X.
2019-10-17	9	959	72									You will ask for "Please carefully fill out the questionnaire of drug X" to obtain exposure information.
2019-10-17	9	960	73									You will ask for "Please carefully fill out the questionnaire of drug X" to obtain exposure information.
2019-10-17	9	961	74									You will ask for "Please carefully fill out the questionnaire of drug X" to obtain exposure information.
2019-10-17	9	962	75									You will present a poster entitled “Recruiting Patients Taking Drug X for study” and recruit the study subjects.
2019-10-17	9	963	76									You will ask for "Please carefully fill out the questionnaire of drug X" to obtain exposure information.
2019-10-17	9	964	77									You will ask for "Please carefully fill out the questionnaire of drug X" to obtain exposure information.
2019-10-17	9	965	78									You will present a poster entitled “Recruiting Patients Taking Drug X for study” and recruit the study subjects.
2019-10-17	9	966	79									You will ask for "Please carefully fill out the questionnaire of drug X" to obtain exposure information.
2019-10-17	9	967	80									Those interviewing the subject and gathering outcome information should not know whether they are taking drug X.
2019-10-17	9	968	81									You will ask for "Please carefully fill out the questionnaire of drug X" to obtain exposure information.
2019-10-17	9	969	82									You will present a poster entitled “Recruiting Patients Taking Drug X for study” and recruit the study subjects.
2019-10-17	9	970	83									You will ask for "Please carefully fill out the questionnaire of drug X" to obtain exposure information.
2019-10-17	9	971	84									You will ask for "Please carefully fill out the questionnaire of drug X" to obtain exposure information.
2019-10-17	9	972	85									You will present a poster entitled “Recruiting Patients Taking Drug X for study” and recruit the study subjects.
2019-10-17	9	973	86									You will ask for "Please carefully fill out the questionnaire of drug X" to obtain exposure information.
2019-10-17	9	974	87									Those interviewing the subject and gathering outcome information should not know whether they are taking drug X.
2019-10-17	9	975	88									You will ask for "Please carefully fill out the questionnaire of drug X" to obtain exposure information.
2019-10-17	9	976	89									You will present a poster entitled “Recruiting Patients Taking Drug X for study” and recruit the study subjects.
2019-10-17	9	977	90									You will ask for "Please carefully fill out the questionnaire of drug X" to obtain exposure information.
2019-10-17	9	978	91									You will present a poster entitled “Recruiting Patients Taking Drug X for study” and recruit the study subjects.
2019-10-17	9	979	92									You will present a poster, "We are investigating the relationship between drug X and depression. Recruting Patients." and recruit the study subjects.
2019-10-17	9	980	93									You will ask for "Please carefully fill out the questionnaire of drug X" to obtain exposure information.
2019-10-17	9	981	94									You will ask for "Please carefully fill out the questionnaire of drug X" to obtain exposure information.
2019-10-17	9	982	95									You will present a poster entitled “Recruiting Patients Taking Drug X for study” and recruit the study subjects.
2019-10-17	9	983	96									Those interviewing the subject and gathering outcome information should not know whether they are taking drug X.
2019-10-17	9	984	97									You will ask for "Please carefully fill out the questionnaire of drug X" to obtain exposure information.
2019-10-17	9	985	98									You will ask for "Please carefully fill out the questionnaire of drug X" to obtain exposure information.
2019-10-17	9	986	99									You will ask for "Please carefully fill out the questionnaire of drug X" to obtain exposure information.
2019-10-17	9	987	100									You will present a poster, "We are investigating the relationship between drug X and depression. Recruting Patients." and recruit the study subjects.
2019-10-17	9	988	101									You will ask for "Please carefully fill out the questionnaire of drug X" to obtain exposure information.
2019-10-17	9	989	102									Those interviewing the subject and gathering outcome information should not know whether they are taking drug X.
2019-10-17	9	990	103									Those interviewing the subject and gathering outcome information should not know whether they are taking drug X.
2019-10-17	9	991	104									You will ask for "Please carefully fill out the questionnaire of drug X" to obtain exposure information.
2019-10-17	9	992	105									You will present a poster, "We are investigating the relationship between drug X and depression. Recruting Patients." and recruit the study subjects.
2019-10-17	9	993	106									You will ask for "Please carefully fill out the questionnaire of drug X" to obtain exposure information.
2019-10-17	9	994	107									Those interviewing the subject and gathering outcome information should not know whether they are taking drug X.
2019-10-17	9	995	108									You will present a poster entitled “Recruiting Patients Taking Drug X for study” and recruit the study subjects.
2019-10-17	9	996	109									Those interviewing the subject and gathering outcome information should not know whether they are taking drug X.
2019-10-17	9	997	110									You will present a poster entitled “Recruiting Patients Taking Drug X for study” and recruit the study subjects.
2019-10-17	10	998	1										Those interviewing the subject and gathering outcome information should not know whether they are taking drug X.
2019-10-17	10	999	2										Those interviewing the subject and gathering outcome information should not know whether they are taking drug X.
2019-10-17	10	1000	3										Those interviewing the subject and gathering outcome information should not know whether they are taking drug X.
2019-10-17	10	1001	4										Those interviewing the subject and gathering outcome information should not know whether they are taking drug X.
2019-10-17	10	1002	5										Those interviewing the subject and gathering outcome information should not know whether they are taking drug X.
2019-10-17	10	1003	6										Those interviewing the subject and gathering outcome information should not know whether they are taking drug X.
2019-10-17	10	1004	7										You will present a poster, "We are investigating the relationship between drug X and depression. Recruting Patients." and recruit the study subjects.
2019-10-17	10	1005	8										Those interviewing the subject and gathering outcome information should not know whether they are taking drug X.
2019-10-17	10	1006	9										Those interviewing the subject and gathering outcome information should not know whether they are taking drug X.
2019-10-17	10	1007	10										Those interviewing the subject and gathering outcome information should not know whether they are taking drug X.
2019-10-17	10	1008	11										Those interviewing the subject and gathering outcome information should not know whether they are taking drug X.
2019-10-17	10	1009	12										Those interviewing the subject and gathering outcome information should not know whether they are taking drug X.
2019-10-17	10	1010	13										Those interviewing the subject and gathering outcome information should not know whether they are taking drug X.
2019-10-17	10	1011	14										You will ask for "Please carefully fill out the questionnaire of drug X" to obtain exposure information.
2019-10-17	10	1012	15										Those interviewing the subject and gathering outcome information should not know whether they are taking drug X.
2019-10-17	10	1013	16										Those interviewing the subject and gathering outcome information should not know whether they are taking drug X.
2019-10-17	10	1014	17										You will ask for "Please carefully fill out the questionnaire of drug X" to obtain exposure information.
2019-10-17	10	1015	18										Those interviewing the subject and gathering outcome information should not know whether they are taking drug X.
2019-10-17	10	1016	19										You will present a poster entitled “Recruiting Patients Taking Drug X for study” and recruit the study subjects.
2019-10-17	10	1017	20										Those interviewing the subject and gathering outcome information should not know whether they are taking drug X.
2019-10-17	10	1018	21										You will ask for "Please carefully fill out the questionnaire of drug X" to obtain exposure information.
2019-10-17	10	1019	22										Those interviewing the subject and gathering outcome information should not know whether they are taking drug X.
2019-10-17	10	1020	23										You will present a poster, "We are investigating the relationship between drug X and depression. Recruting Patients." and recruit the study subjects.
2019-10-17	10	1021	24										Those interviewing the subject and gathering outcome information should not know whether they are taking drug X.
2019-10-17	10	1022	25										Those interviewing the subject and gathering outcome information should not know whether they are taking drug X.
2019-10-17	10	1023	26										Those interviewing the subject and gathering outcome information should not know whether they are taking drug X.
2019-10-17	10	1024	27										You will present a poster entitled “Recruiting Patients Taking Drug X for study” and recruit the study subjects.
2019-10-17	10	1025	28										Those interviewing the subject and gathering outcome information should not know whether they are taking drug X.
2019-10-17	10	1026	29										Those interviewing the subject and gathering outcome information should not know whether they are taking drug X.
2019-10-17	10	1027	30										Those interviewing the subject and gathering outcome information should not know whether they are taking drug X.
2019-10-17	10	1028	31										Those interviewing the subject and gathering outcome information should not know whether they are taking drug X.
2019-10-17	10	1029	32										Those interviewing the subject and gathering outcome information should not know whether they are taking drug X.
2019-10-17	10	1030	33										Those interviewing the subject and gathering outcome information should not know whether they are taking drug X.
2019-10-17	10	1031	34										Those interviewing the subject and gathering outcome information should not know whether they are taking drug X.
2019-10-17	10	1032	35										You will ask for "Please carefully fill out the questionnaire of drug X" to obtain exposure information.
2019-10-17	10	1033	36										Those interviewing the subject and gathering outcome information should not know whether they are taking drug X.
2019-10-17	10	1034	37										Those interviewing the subject and gathering outcome information should not know whether they are taking drug X.
2019-10-17	10	1035	38										Those interviewing the subject and gathering outcome information should not know whether they are taking drug X.
2019-10-17	10	1036	39										Those interviewing the subject and gathering outcome information should not know whether they are taking drug X.
2019-10-17	10	1037	40										Those interviewing the subject and gathering outcome information should not know whether they are taking drug X.
2019-10-17	10	1038	41										Those interviewing the subject and gathering outcome information should not know whether they are taking drug X.
2019-10-17	10	1039	42										Those interviewing the subject and gathering outcome information should not know whether they are taking drug X.
2019-10-17	10	1040	43										Those interviewing the subject and gathering outcome information should not know whether they are taking drug X.
2019-10-17	10	1041	44										You will ask for "Please carefully fill out the questionnaire of drug X" to obtain exposure information.
2019-10-17	10	1042	45										Those interviewing the subject and gathering outcome information should not know whether they are taking drug X.
2019-10-17	10	1043	46										You will present a poster, "We are investigating the relationship between drug X and depression. Recruting Patients." and recruit the study subjects.
2019-10-17	10	1044	47										Those interviewing the subject and gathering outcome information should not know whether they are taking drug X.
2019-10-17	10	1045	48										Those interviewing the subject and gathering outcome information should not know whether they are taking drug X.
2019-10-17	10	1046	49										Those interviewing the subject and gathering outcome information should not know whether they are taking drug X.
2019-10-17	10	1047	50										Those interviewing the subject and gathering outcome information should not know whether they are taking drug X.
2019-10-17	10	1048	51										Those interviewing the subject and gathering outcome information should not know whether they are taking drug X.
2019-10-17	10	1049	52										Those interviewing the subject and gathering outcome information should not know whether they are taking drug X.
2019-10-17	10	1050	53										You will present a poster entitled “Recruiting Patients Taking Drug X for study” and recruit the study subjects.
2019-10-17	10	1051	54										You will present a poster entitled “Recruiting Patients Taking Drug X for study” and recruit the study subjects.
2019-10-17	10	1052	55										Those interviewing the subject and gathering outcome information should not know whether they are taking drug X.
2019-10-17	10	1053	56										You will present a poster entitled “Recruiting Patients Taking Drug X for study” and recruit the study subjects.
2019-10-17	10	1054	57										Those interviewing the subject and gathering outcome information should not know whether they are taking drug X.
2019-10-17	10	1055	58										Those interviewing the subject and gathering outcome information should not know whether they are taking drug X.
2019-10-17	10	1056	59										Those interviewing the subject and gathering outcome information should not know whether they are taking drug X.
2019-10-17	10	1057	60										Those interviewing the subject and gathering outcome information should not know whether they are taking drug X.
2019-10-17	10	1058	61										You will present a poster entitled “Recruiting Patients Taking Drug X for study” and recruit the study subjects.
2019-10-17	10	1059	62										Those interviewing the subject and gathering outcome information should not know whether they are taking drug X.
2019-10-17	10	1060	63										You will present a poster entitled “Recruiting Patients Taking Drug X for study” and recruit the study subjects.
2019-10-17	10	1061	64										Those interviewing the subject and gathering outcome information should not know whether they are taking drug X.
2019-10-17	10	1062	65										Those interviewing the subject and gathering outcome information should not know whether they are taking drug X.
2019-10-17	10	1063	66										You will ask for "Please carefully fill out the questionnaire of drug X" to obtain exposure information.
2019-10-17	10	1064	67										Those interviewing the subject and gathering outcome information should not know whether they are taking drug X.
2019-10-17	10	1065	68										Those interviewing the subject and gathering outcome information should not know whether they are taking drug X.
2019-10-17	10	1066	69										You will ask for "Please carefully fill out the questionnaire of drug X" to obtain exposure information.
2019-10-17	10	1067	70										Those interviewing the subject and gathering outcome information should not know whether they are taking drug X.
2019-10-17	10	1068	71										You will ask for "Please carefully fill out the questionnaire of drug X" to obtain exposure information.
2019-10-17	10	1069	72										Those interviewing the subject and gathering outcome information should not know whether they are taking drug X.
2019-10-17	10	1070	73										Those interviewing the subject and gathering outcome information should not know whether they are taking drug X.
2019-10-17	10	1071	74										You will present a poster entitled “Recruiting Patients Taking Drug X for study” and recruit the study subjects.
2019-10-17	10	1072	75										Those interviewing the subject and gathering outcome information should not know whether they are taking drug X.
2019-10-17	10	1073	76										Those interviewing the subject and gathering outcome information should not know whether they are taking drug X.
2019-10-17	10	1074	77										Those interviewing the subject and gathering outcome information should not know whether they are taking drug X.
2019-10-17	10	1075	78										Those interviewing the subject and gathering outcome information should not know whether they are taking drug X.
2019-10-17	10	1076	79										Those interviewing the subject and gathering outcome information should not know whether they are taking drug X.
2019-10-17	10	1077	80										You will ask for "Please carefully fill out the questionnaire of drug X" to obtain exposure information.
2019-10-17	10	1078	81										You will ask for "Please carefully fill out the questionnaire of drug X" to obtain exposure information.
2019-10-17	10	1079	82										You will present a poster, "We are investigating the relationship between drug X and depression. Recruting Patients." and recruit the study subjects.
2019-10-17	10	1080	83										Those interviewing the subject and gathering outcome information should not know whether they are taking drug X.
2019-10-17	10	1081	84										Those interviewing the subject and gathering outcome information should not know whether they are taking drug X.
2019-10-17	10	1082	85										Those interviewing the subject and gathering outcome information should not know whether they are taking drug X.
2019-10-17	10	1083	86										Those interviewing the subject and gathering outcome information should not know whether they are taking drug X.
2019-10-17	10	1084	87										You will present a poster, "We are investigating the relationship between drug X and depression. Recruting Patients." and recruit the study subjects.
2019-10-17	10	1085	88										Those interviewing the subject and gathering outcome information should not know whether they are taking drug X.
2019-10-17	10	1086	89										You will ask for "Please carefully fill out the questionnaire of drug X" to obtain exposure information.
2019-10-17	10	1087	90										Those interviewing the subject and gathering outcome information should not know whether they are taking drug X.
2019-10-17	10	1088	91										You will present a poster entitled “Recruiting Patients Taking Drug X for study” and recruit the study subjects.
2019-10-17	10	1089	92										Those interviewing the subject and gathering outcome information should not know whether they are taking drug X.
2019-10-17	10	1090	93										You will present a poster, "We are investigating the relationship between drug X and depression. Recruting Patients." and recruit the study subjects.
2019-10-17	10	1091	94										Those interviewing the subject and gathering outcome information should not know whether they are taking drug X.
2019-10-17	10	1092	95										You will ask for "Please carefully fill out the questionnaire of drug X" to obtain exposure information.
2019-10-17	10	1093	96										Those interviewing the subject and gathering outcome information should not know whether they are taking drug X.
2019-10-17	10	1094	97										Those interviewing the subject and gathering outcome information should not know whether they are taking drug X.
2019-10-17	10	1095	98										Those interviewing the subject and gathering outcome information should not know whether they are taking drug X.
2019-10-17	10	1096	99										You will ask for "Please carefully fill out the questionnaire of drug X" to obtain exposure information.
2019-10-17	10	1097	100										You will present a poster entitled “Recruiting Patients Taking Drug X for study” and recruit the study subjects.
2019-10-17	10	1098	101										You will ask for "Please carefully fill out the questionnaire of drug X" to obtain exposure information.
2019-10-17	10	1099	102										Those interviewing the subject and gathering outcome information should not know whether they are taking drug X.
2019-10-17	10	1100	103										You will ask for "Please carefully fill out the questionnaire of drug X" to obtain exposure information.
2019-10-17	10	1101	104										You will present a poster, "We are investigating the relationship between drug X and depression. Recruting Patients." and recruit the study subjects.
2019-10-17	10	1102	105										Those interviewing the subject and gathering outcome information should not know whether they are taking drug X.
2019-10-17	10	1103	106										You will present a poster, "We are investigating the relationship between drug X and depression. Recruting Patients." and recruit the study subjects.

## Sheet: note
Date (column A)
	This is the date on which the student responded.
		2019-10-17
Session (column B)
	This is an index to show which questions are responsed.
		Session1=response to Q1 before discussion
		Session2=response to Q1 after discussion
		Session3=response to Q2 before discussion
		Session4=response to Q2 after discussion
		Session5=response to Q3 before discussion
		Session6=response to Q3 after discussion
		Session7=response to Q4 before discussion
		Session8=response to Q4 after discussion
		Session9=response to Q5 before discussion
		Session10=response to Q5 after discussion
Voter (column C)
	This is an index of responses and unique value for each answer.
Voter in session (column D)
	This is an index of responses and unique value for each answer in every session.
Columns after E
	Here are the tests given in class and the students' answers.
